# Supplementary material for: A F-deficient and high-Mn ternary perovskite fluoride anode with a dominant conversion mechanism for advanced Li-ion batteries
Source: Royal Society of Chemistry journal article supplement (doi:10.1039/d1cc00910a), 2021-01-01
Supplement: d1cc00910a1.pdf [file d1cc00910a1.pdf]

## Electronic Supplementary Information

### **A F-deficient and high-Mn ternary perovskite fluoride anode with a dominant conversion mechanism for advanced Li-ion batteries**

Yongfa Huang, Rui Ding\*, Danfeng Ying, Yuxi Huang, Caini Tan, Tong Yan, Xiujuan Sun, and Enhui Liu

*Key Laboratory of Environmentally Friendly Chemistry and Applications of Ministry of Education,  
College of Chemistry, Xiangtan University, Hunan 411105, P.R. China*

---

\* E-mails: [drm8122@163.com](mailto:drm8122@163.com); [drm8122@xtu.edu.cn](mailto:drm8122@xtu.edu.cn) (R. Ding);

Tel: +86 731 58292202; Fax: +86 731 58292251

## Table of contents

|                                                                                                                                                                                           |    |
|-------------------------------------------------------------------------------------------------------------------------------------------------------------------------------------------|----|
| <b>Experimental section</b> .....                                                                                                                                                         | 4  |
| <b>Figure S1</b> Quantitative analysis of XRD data of KNCMF-3# sample: XRD patterns (a), quantitative results (b), integrated areas of impurity MF <sub>2</sub> (c) and KNCMF-3# (d)..... | 7  |
| <b>Figure S2</b> (a) EDS spectra and (b-n) element mapping from SEM/TEM images of KNCMF-3# sample.....                                                                                    | 8  |
| <b>Figure S3</b> (a) BET, (b) pore volume and (c) pore size distribution of KNCMF-3# sample.....                                                                                          | 9  |
| <b>Figure S4</b> (a-f) GCD curves of KNCMF 1#~6# electrodes at 0.1-3.2 A g <sup>-1</sup> .....                                                                                            | 10 |
| <b>Figure S5</b> (a-d) GCD curves of KNCMF 7#~10# electrodes at 0.1-3.2 A g <sup>-1</sup> .....                                                                                           | 11 |
| <b>Figure S6</b> (a-f) rate performance and Coulombic efficiency of KNCMF 1#~6# electrodes at 0.1-3.2-0.1 A g <sup>-1</sup> .....                                                         | 12 |
| <b>Figure S7</b> (a-d) rate performance and Coulombic efficiency of KNCMF 7#~10# electrodes at 0.1-3.2-0.1 A g <sup>-1</sup> .....                                                        | 13 |
| <b>Figure S8</b> (a-f) cycling stability and Coulombic efficiency of KNCMF 1#~6# electrodes at 2 A g <sup>-1</sup> for 1000 cycles.....                                                   | 14 |
| <b>Figure S9</b> (a-d) cycling stability and Coulombic efficiency of KNCMF 7#~10# electrodes at 2 A g <sup>-1</sup> for 1000 cycles.....                                                  | 15 |
| <b>Figure S10</b> GCD curves of the first five cycles for KNCMF-3# electrode at 0.1 A g <sup>-1</sup> .....                                                                               | 16 |
| <b>Figure S11</b> (a-i) CV plots of the first three cycles of KNCMF (1#, 2#, 4#, 5#, 6#, 7#, 8#, 9#, 10#) electrodes at 0.3 mV s <sup>-1</sup> .....                                      | 17 |
| <b>Figure S12</b> (a-i) GCD curves of the first five cycles for KNCMF (1#, 2#, 4#, 5#, 6#, 7#, 8#, 9#, 10#) electrodes at 0.1 A g <sup>-1</sup> .....                                     | 18 |
| <b>Figure S13</b> Pseudocapacitive contribution CV plots in shadow regions (a-j) and ratios (k) of the KNCMF-3# electrode.....                                                            | 19 |
| <b>Figure S14</b> CV plots at 0.5~50 mV s <sup>-1</sup> (a, c, e) and plots of lgi~lgv (b, d, f) of the KNF, KCF and KMF electrodes.....                                                  | 20 |
| <b>Figure S15</b> The equivalent circuits used to fit the experimental Nyquist plots (a) before and (b) after cycling of KNCMF-3# electrode.....                                          | 21 |
| <b>Figure S16</b> Performance of LFP electrode for Li-ion storage.....                                                                                                                    | 22 |
| <b>Figure S17</b> GCD curves of KNCMF-3# electrode at the pre-charged current density of 0.1 A g <sup>-1</sup> .....                                                                      | 23 |

|                                                                                                                                                                                                                                                                                                                                                                                                                   |    |
|-------------------------------------------------------------------------------------------------------------------------------------------------------------------------------------------------------------------------------------------------------------------------------------------------------------------------------------------------------------------------------------------------------------------|----|
| <b>Figure S18</b> (a) CV plots of 4.7 V-KNCMF-3#/LFP LIBs, (b) GCD curves of 4.7 V-KNCMF-3#/LFP LIBs.....                                                                                                                                                                                                                                                                                                         | 24 |
| <b>Figure S19</b> Performance of KNCMF-3#/LFP LIBs at the -20°C.....                                                                                                                                                                                                                                                                                                                                              | 25 |
| <b>Figure S20</b> Performance of KNCMF-3#/LFP LIBs at the 40°C.....                                                                                                                                                                                                                                                                                                                                               | 26 |
| <b>Figure S21</b> The experiment on lighting up a LED lamp at different time points based on the KNCMF//LFP LIB, (a) initial, (b) after 10 minutes, and (c) after 20 minutes.....                                                                                                                                                                                                                                 | 27 |
| <b>Figure S22</b> XPS control experiments (Ar-protected and Air-exposed) of the KNCMF-3# electrode in charged-3 V and discharged-0.01 V states for the first cycle.....                                                                                                                                                                                                                                           | 28 |
| <b>Figure S23</b> XPS spectra (air-exposed) of the KNCMF-3# electrode in pristine, discharged -0.01 V and charged -3 V states for the first cycle at 0.05 A g <sup>-1</sup> : (a) survey, (b) Ni2p, (c) Co2p, (d) Mn2p, (e) K2p, (f) F1s and (g) Li1s.....                                                                                                                                                        | 29 |
| <b>Figure S24</b> Ex-situ XRD plots in pristine and initial discharged/charged states (discharged-0.6 V, discharged-0.2 V, discharged-0.01 V, charged-1 V, charged-1.4 V, charged-2.4 V, charged-3 V) of the KNCMF-3# electrode.....                                                                                                                                                                              | 30 |
| <b>Figure S25</b> (a) Schematics of reaction mechanisms of F-deficient and high-Mn ternary perovskite fluoride KNCMF-3# electrode during the discharging/charging processes under the first two cycles for Li-ion storage; (b) Crystalline information of Ni, Co, Mn, LiF and KMF <sub>3</sub> (M=Ni, Co, Mn) phases; (c) The equations for reaction mechanisms of the KNCMF-3# electrode for Li-ion storage..... | 31 |
| <b>Table S1</b> Orthogonal experimental design.....                                                                                                                                                                                                                                                                                                                                                               | 33 |
| <b>Table S2</b> Synthesis condition of KNCMF 1#~10#.....                                                                                                                                                                                                                                                                                                                                                          | 34 |
| <b>Table S3</b> Summary of performance of KNCMF electrodes.....                                                                                                                                                                                                                                                                                                                                                   | 35 |
| <b>Table S4</b> Orthogonal experimental analysis results of KNCMF.....                                                                                                                                                                                                                                                                                                                                            | 36 |
| <b>Table S5</b> EIS parameters of KNCMF-3# electrode before and after cycling.....                                                                                                                                                                                                                                                                                                                                | 37 |
| <b>Table S6</b> Design of <i>m</i> <sub>+</sub> / <i>m</i> <sub>-</sub> ratios for KNCMF-3#/LFP LIBs.....                                                                                                                                                                                                                                                                                                         | 38 |
| <b>Table S7</b> Summary of performance of KNCMF-3#/LFP LIBs at room temperature (about 25 °C).....                                                                                                                                                                                                                                                                                                                | 39 |
| <b>Table S8</b> . A performance comparison of this work with some reported LIBs.....                                                                                                                                                                                                                                                                                                                              | 40 |
| <b>Table S9</b> Summary of performance of KNCMF-3#/LFP LIBs at the -20 / 40 °C.....                                                                                                                                                                                                                                                                                                                               | 41 |
| <b>Table S10</b> A performance comparison of this work with some reported perovskite fluorides anode materials for LIBs.....                                                                                                                                                                                                                                                                                      | 42 |
| <b>Table S11</b> Chemicals, reagents and materials used in the study.....                                                                                                                                                                                                                                                                                                                                         | 43 |
| <b>References</b> .....                                                                                                                                                                                                                                                                                                                                                                                           | 44 |

**Experimental section:**

**Preparation of KNCMF:** The KNCMF materials were synthesized by one-pot solvothermal method based on the orthogonal experiment (**Table S1, S2**). Take the procedure of KNCMF-3# for an example. Firstly, 0.4 mmol of  $\text{NiCl}_2 \cdot 6\text{H}_2\text{O}$ , 0.4 mmol of  $\text{CoCl}_2 \cdot 6\text{H}_2\text{O}$ , 1.2 mmol of  $\text{MnCl}_2 \cdot 4\text{H}_2\text{O}$ , 4 mmol of  $\text{KF} \cdot 2\text{H}_2\text{O}$  and 0.2 g of PVP-K30 were dissolved into the mixed solvents of 18 mL ethylene glycol and 18 mL of N-butanol, and then ultrasonically dispersed to an uniform mixture; Secondly, the mixture was poured into a 50 mL stainless steel Teflon reactor, and then placed in an oven under 180 °C for 24 h and allowed to cool down to room temperature; Finally, the precipitates were centrifuged three times with absolute ethanol and then dry in an oven under 100 °C. The other samples were prepared as the above synthetic steps according to the specific orthogonal experimental conditions.

**Characterizations:** The phases and crystal structures of samples were analysed by X-ray diffraction (XRD). The morphology and size of samples were characterized by scanning electron microscopy (SEM) and transmission electron microscopy (TEM). The microstructures of samples were measured by high-resolution TEM (HRTEM) and selected area electron diffraction (SAED). The element composition and distribution of samples were resolved by inductively coupled plasma-optical emission spectrometer (ICP-OES), X-ray energy dispersive spectra (EDS) and mapping. The chemical bonds and electronic structures of samples were checked by X-ray photoelectron spectra (XPS). The specific surface area and pore structure were tested by nitrogen

isothermal sorptions with Brunauer-Emmett-Teller (BET) and Barrett-Joyner-Halenda (BJH) methods, respectively.

***Electrochemical Measurements:*** The electrode fabrication is as follows: the mixture of active materials (for the cathode: LiFePO<sub>4</sub> (LFP); for the anode: KNCMF (1-10#)), acetylene black (AB) and polyvinylidene fluoride (PVDF) (7:2:1, w/w/w) were evenly mixed in N-methyl-2-pyrrolidone (NMP), which was coated onto a carbon-coated Al foil for cathode or Cu foil for anode, then dried in vacuum at 110 °C for 12 h. The coating mass of the active materials is controlled at around 1-3 mg cm<sup>-2</sup>. Li-ion half cells were assembled into a 2032-type coin cells by using Li plate as a reference electrode and a counter electrode (RE/CE), and using an active material (LFP, KNCMF (1-10#)) as a working electrode (WE), 1 M LiPF<sub>6</sub> in ethylene carbonate (EC), ethyl methyl carbonate (EMC) and dimethyl carbonate (DMC) (1:1:1, v/v) with 1 wt% vinylene carbonate (VC) as the electrolytes, and a glass fiber as a separator. The LIBs were also assembled into 2032-type coin cells, the LFP electrode and the pre-lithiated KNCMF-3# anode (0.1 A g<sup>-1</sup> for 4.5 cycles) were used as the cathode and anode respectively. All cells were assembled in an argon-filled glove box (MIKROUNA, O<sub>2</sub> and H<sub>2</sub>O < 0.1 ppm). All electrochemical tests were conducted on CHI 660E and Neware-CT-4008 working stations at room temperature (about 25 °C) except the assigned tests under the low and high temperatures (-20 °C and 40 °C). The chemicals, agents and materials for electrochemical tests are listed in the **Table S10**; The calculations for the specific capacity ( $C_m$ , mAh g<sup>-1</sup>), energy density ( $E_m$ , Wh kg<sup>-1</sup>)

and power density ( $P_m$ , kW kg<sup>-1</sup>) were conducted on the basis of **Equations (1), (2)**

**and (3):**

$$C_m = Q/m \quad \text{S(1)}$$

$$E_m = C_m V \quad \text{S(2)}$$

$$P_m = 3.6 E_m / t \quad \text{S(3)}$$

Where  $m$ ,  $Q$ ,  $V$ , and  $t$  are mass of active materials (g, for full cells, it refers to the total masses of active materials of anode and cathode), charge quantity (mAh), discharge platform voltage (V), and discharge time (s), respectively.

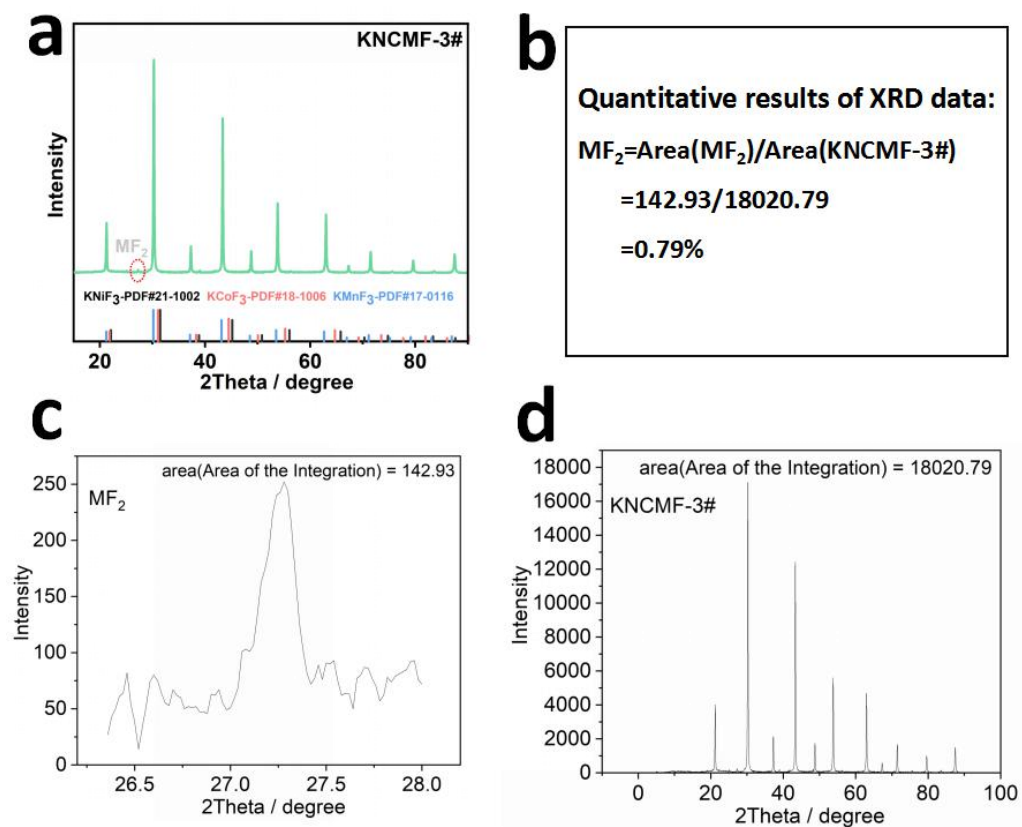

**Figure S1** Quantitative analysis of XRD data of KNCMF-3# sample: XRD patterns (a), quantitative results (b), integrated areas of impurity MF<sub>2</sub> (c) and KNCMF-3# (d).

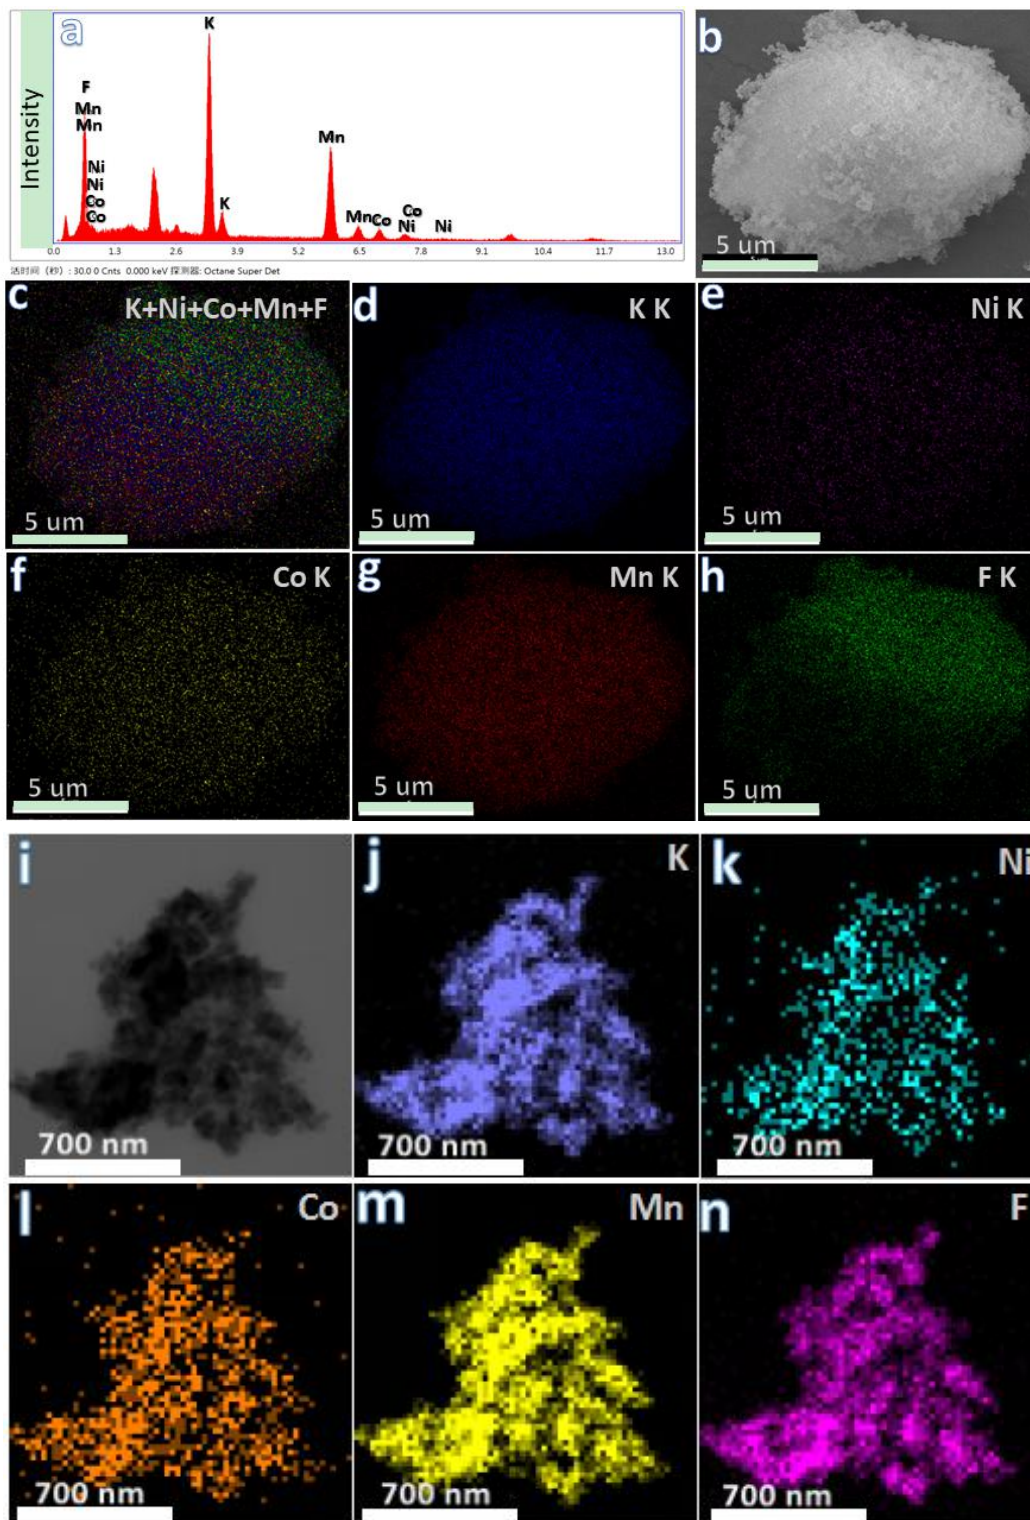

**Figure S2** (a) EDS spectra and (b-n) element mapping from SEM/TEM images of KNCMF-3# sample.



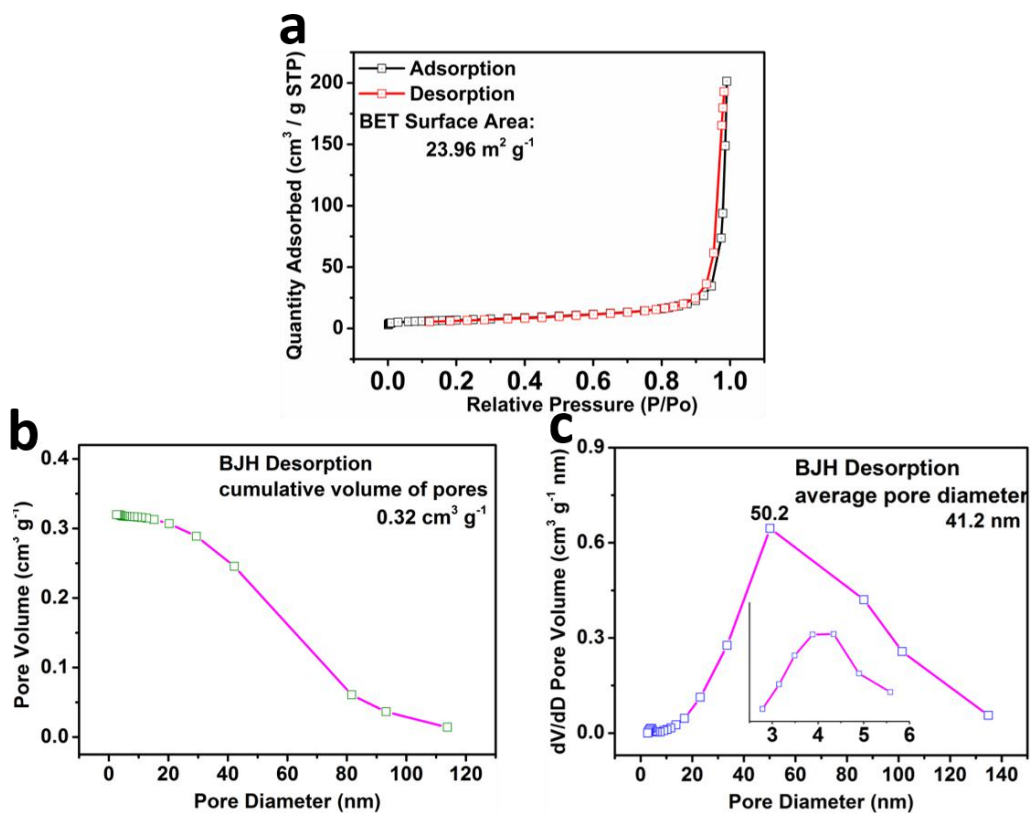

**Figure S3** (a) BET, (b) pore volume and (c) pore size distribution of KNCFM-3# sample.

The  $\text{N}_2$  sorption isotherms in Fig. S3 show the smaller hysteresis loop and the upswept line at the end of the isotherms, indicating the existence of mesopores and macropores. The small specific surface area and pore volume ( $23.96 \text{ m}^2 \text{ g}^{-1}$ ,  $0.32 \text{ cm}^3 \text{ g}^{-1}$ ) indicate the limited sign of mesoporous features. The pore size mainly locates at  $50.2 \text{ nm}$  with the average pore diameter of  $41.2 \text{ nm}$ , which may be formed by the aggregations of particles.

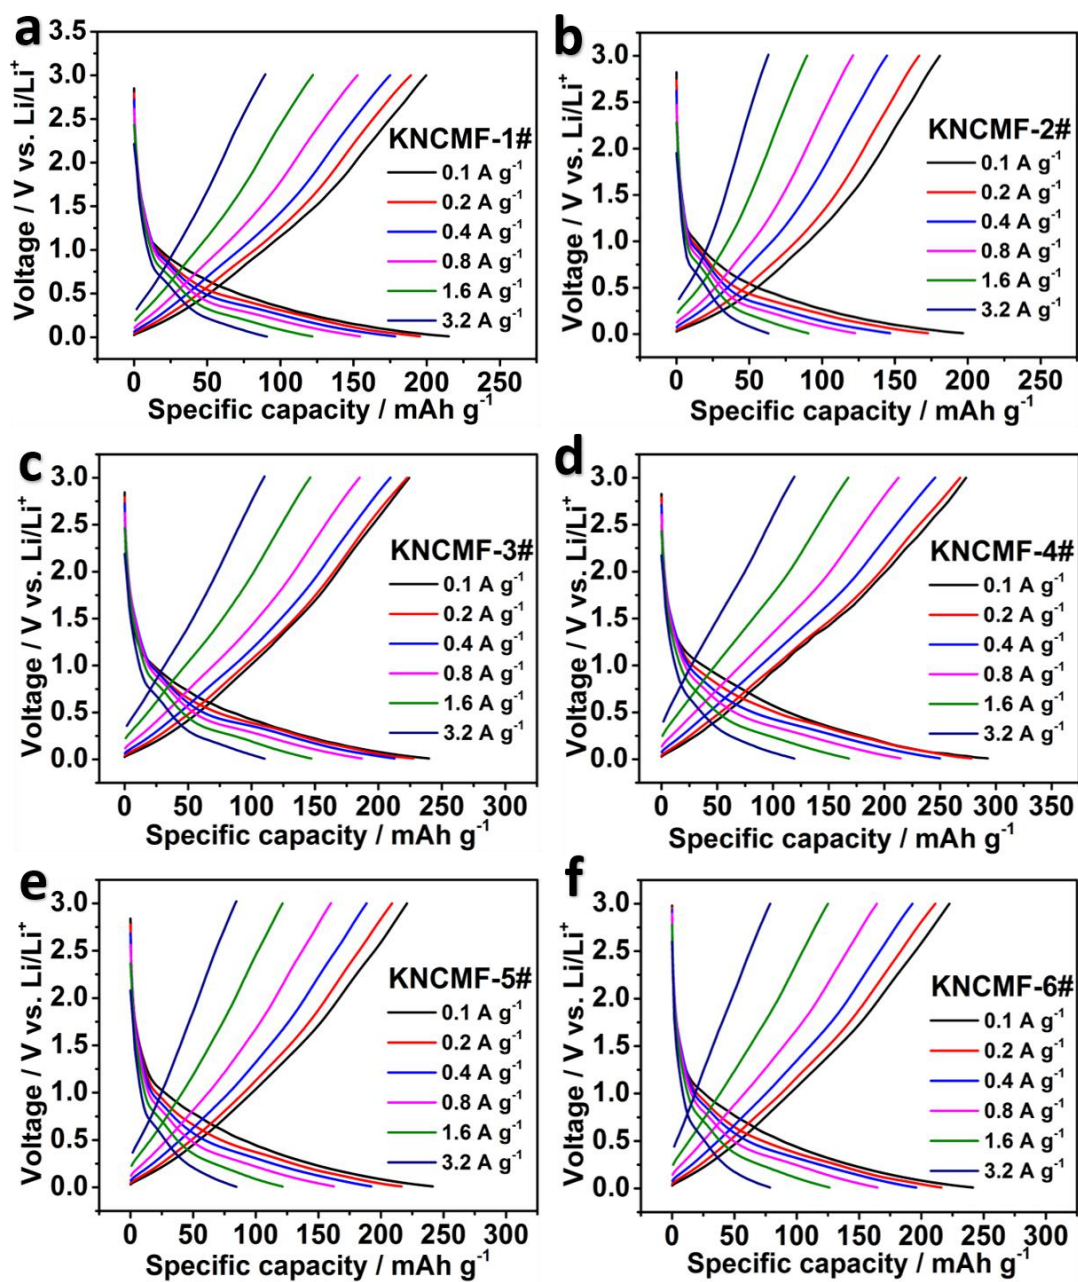

Figure S4 (a-f) GCD curves of KNCMF 1#~6# electrodes at 0.1-3.2 A g<sup>-1</sup>.

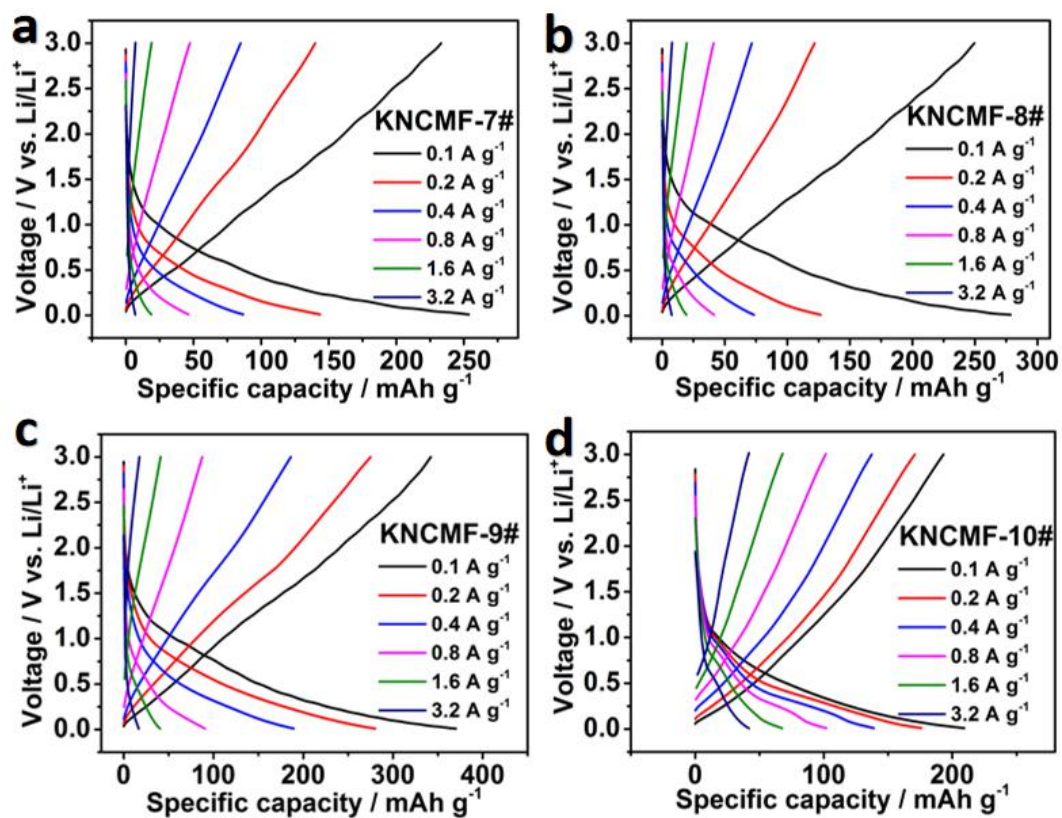

**Figure S5** (a-d) GCD curves of KNCMF 7#~10# electrodes at 0.1-3.2 A g<sup>-1</sup>.

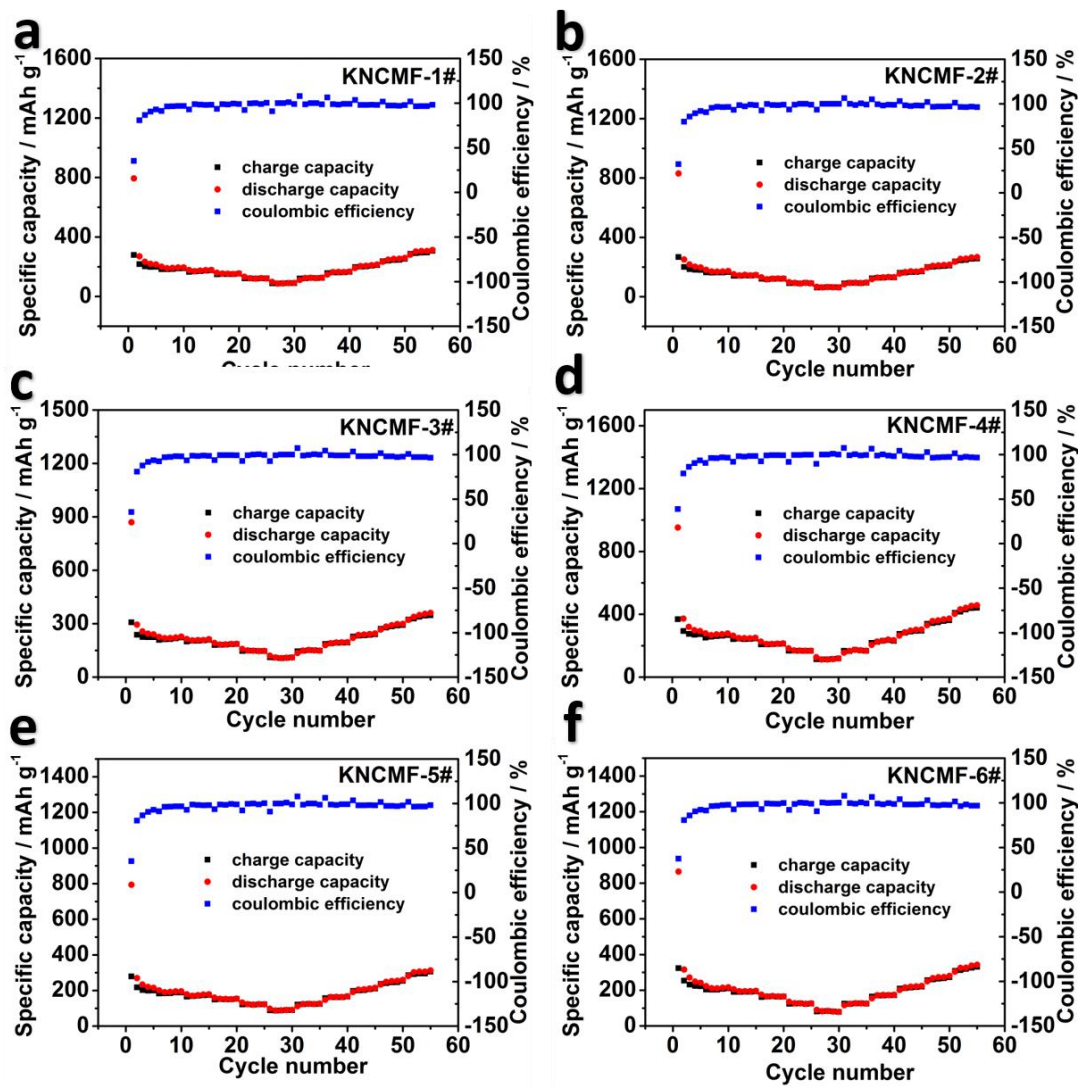

**Figure S6** (a-f) rate performance and Coulombic efficiency of KNCMF 1#~6# electrodes at 0.1-3.2-0.1 A g<sup>-1</sup>.

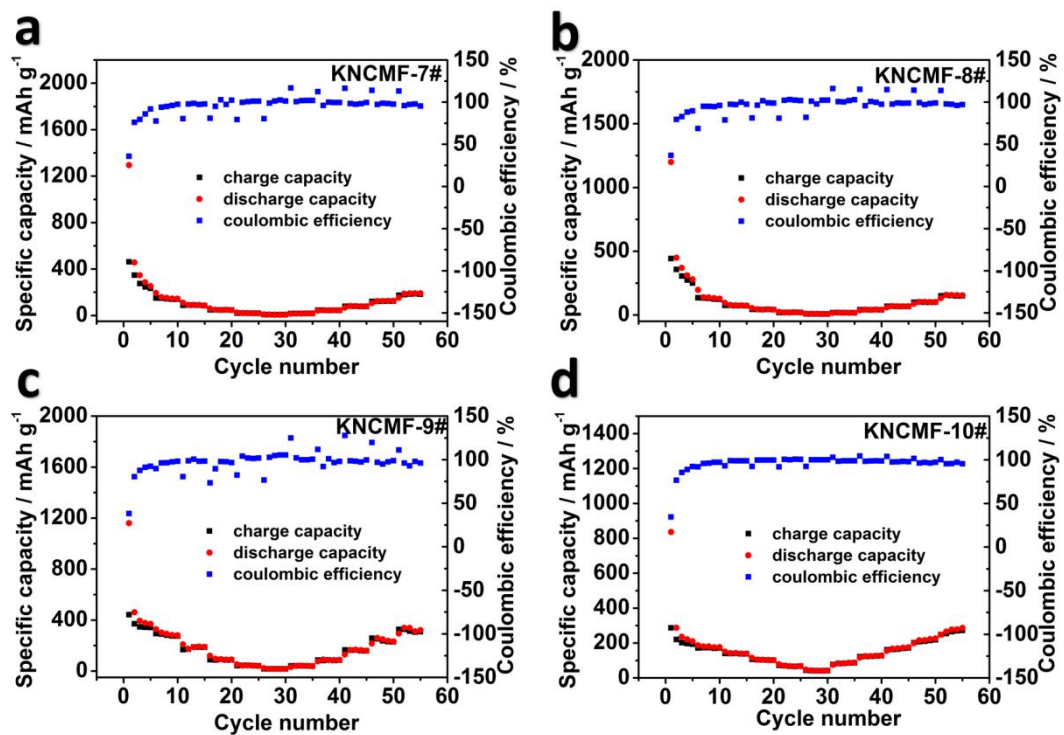

**Figure S7** (a-d) rate performance and Coulombic efficiency of KNCMF 7#~10# electrodes at 0.1-3.2-0.1 A g<sup>-1</sup>.

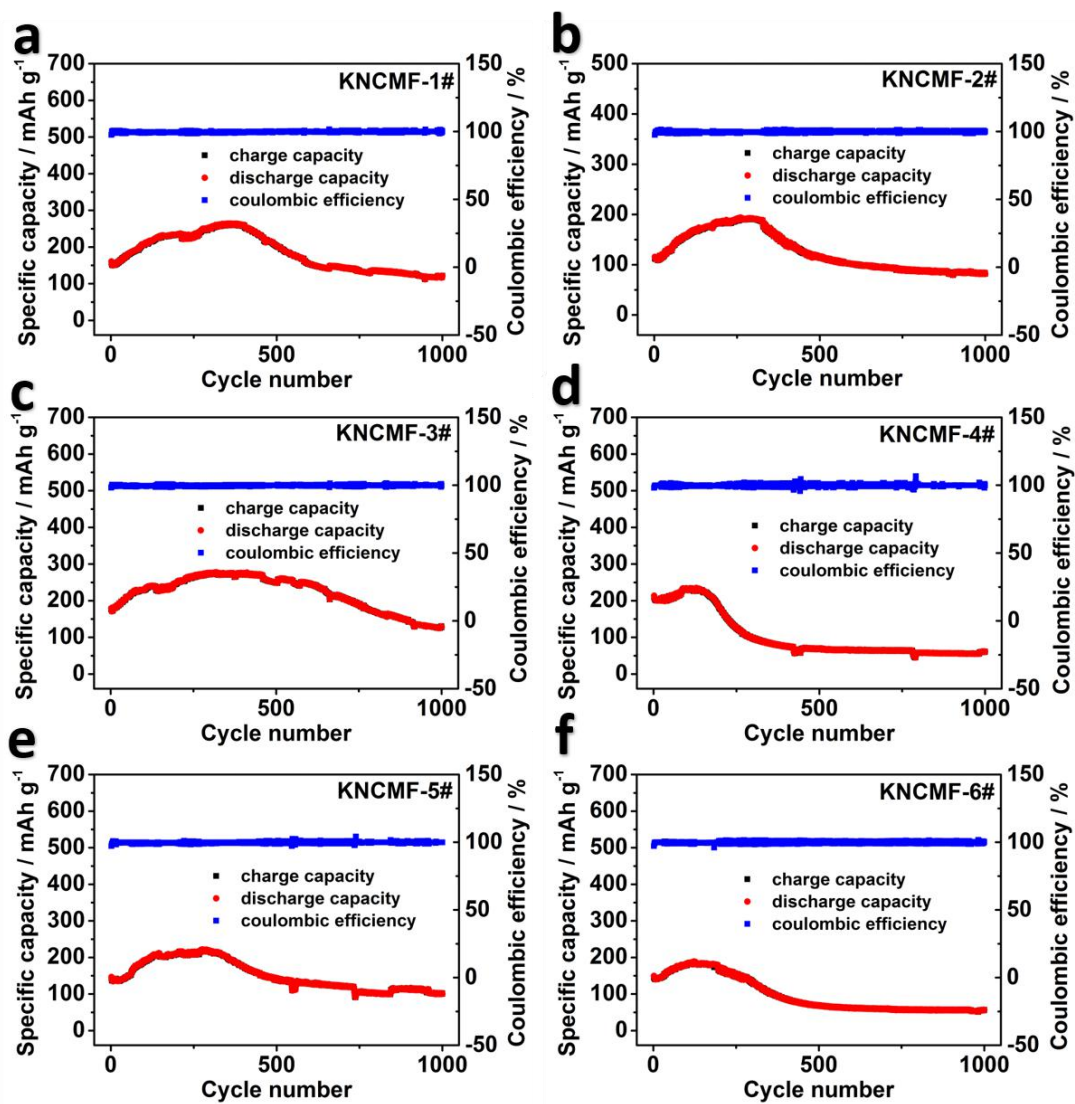

**Figure S8** (a-f) cycling stability and Coulombic efficiency of KNCMF 1#~6# electrodes at 2 A g<sup>-1</sup> for 1000 cycles.

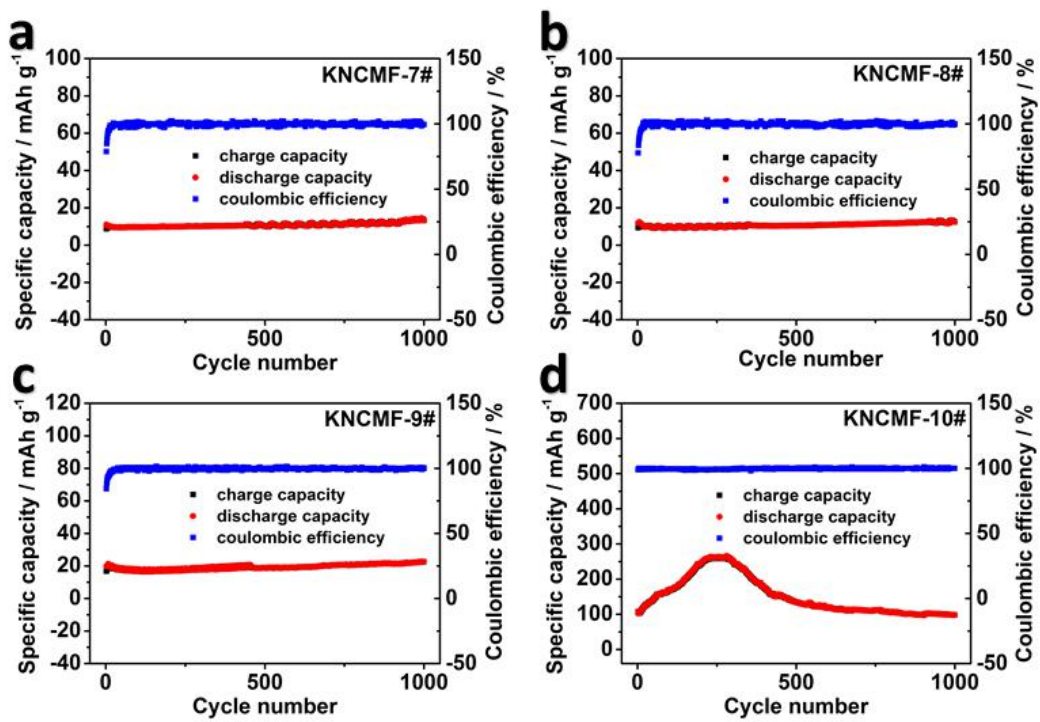

**Figure S9** (a-d) cycling stability and Coulombic efficiency of KNCMF 7#~10# electrodes at 2 A g<sup>-1</sup> for 1000 cycles.

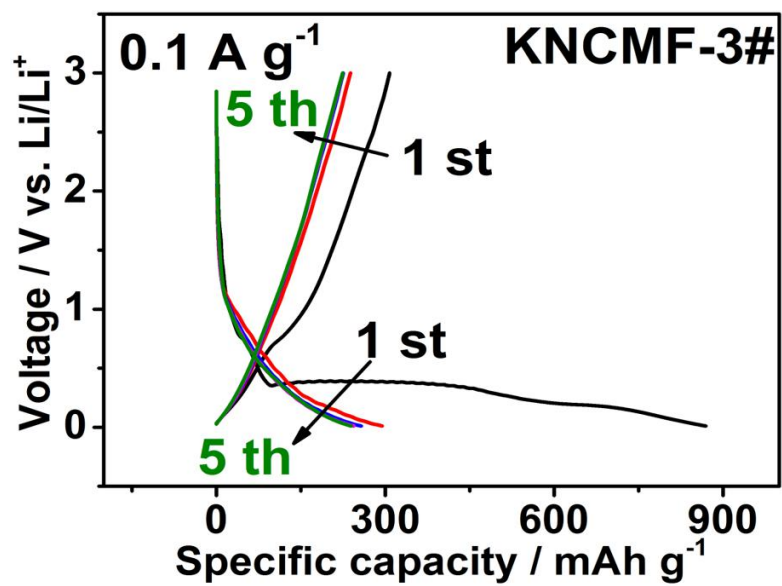

Figure S10 GCD curves of the first five cycles for KNCMF-3# electrode at 0.1 A g<sup>-1</sup>.



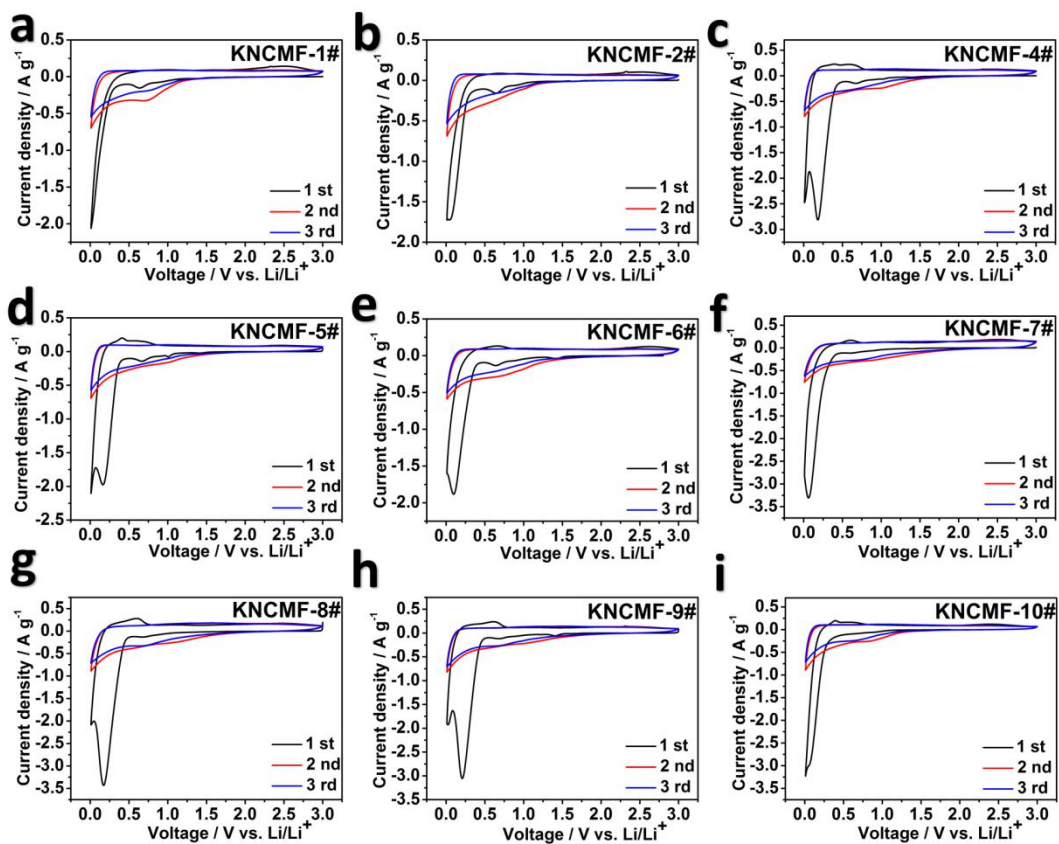

**Figure S11** (a-i) CV plots of the first three cycles of KNCMF (1#, 2#, 4#, 5#, 6#, 7#, 8#, 9#, 10#) electrodes at  $0.3 \text{ mV s}^{-1}$ .

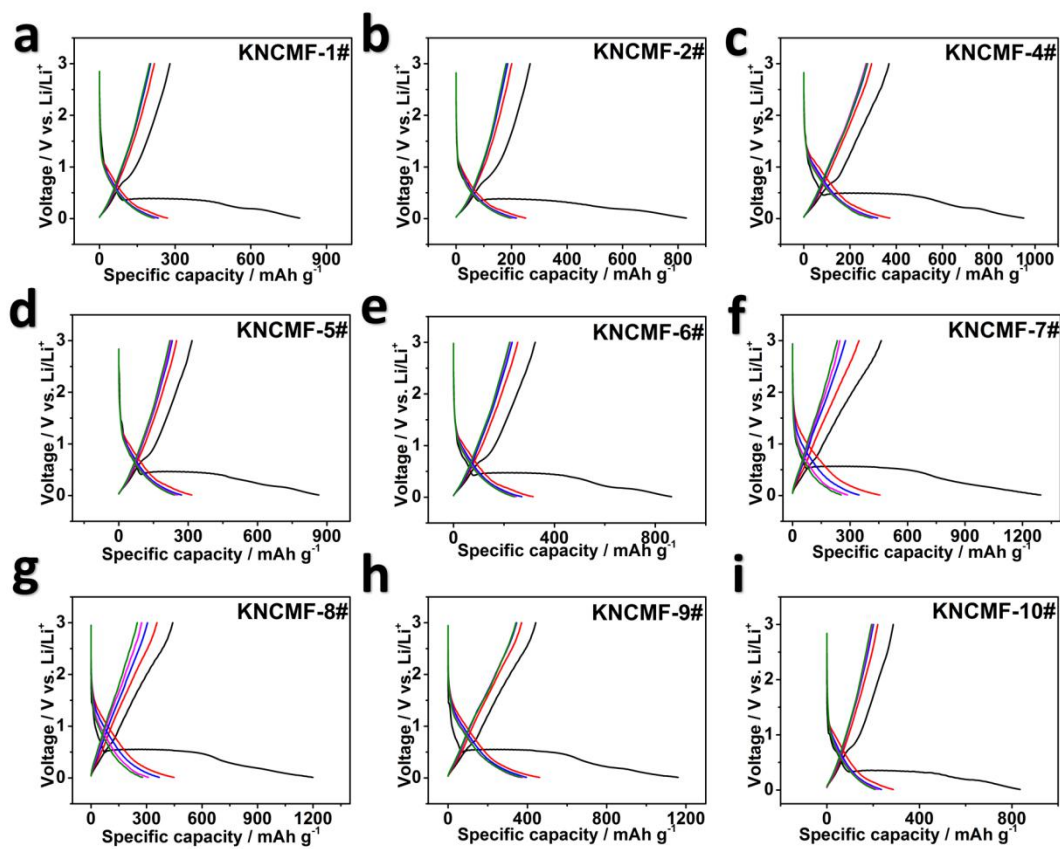

**Figure S12** (a-i) GCD curves of the first five cycles for KNCMF (1#, 2#, 4#, 5#, 6#, 7#, 8#, 9#, 10#) electrodes at  $0.1 \text{ A g}^{-1}$ .

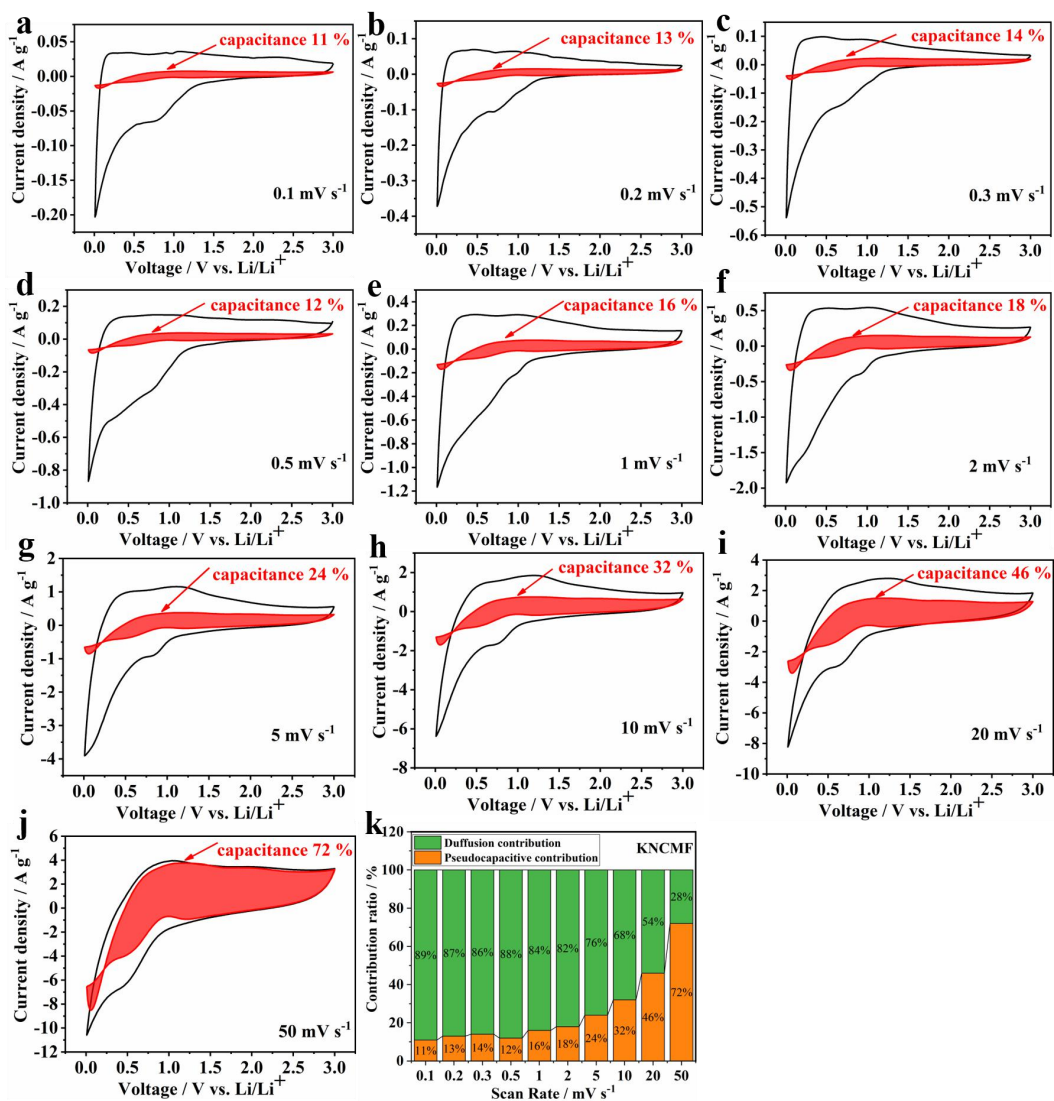

**Figure S13** Pseudocapacitive contribution CV plots in shadow regions (a-j) and ratios (k) of the KNCMF-3# electrode.

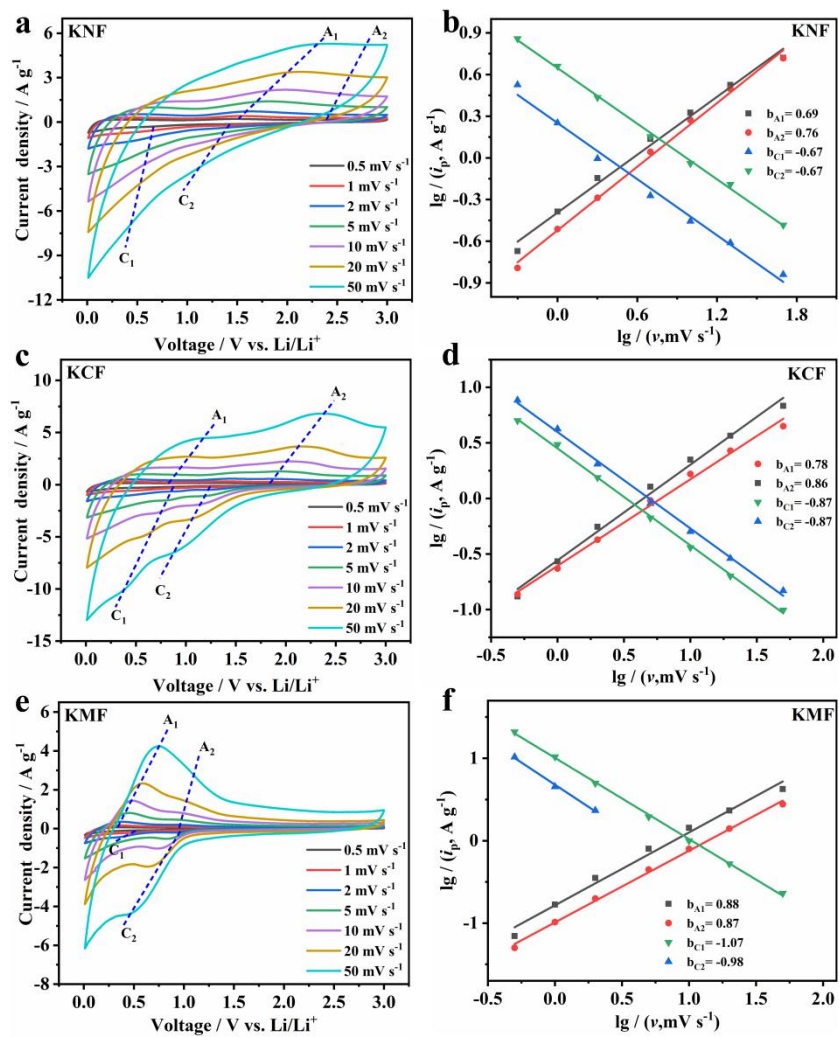

**Figure S14** CV plots at 0.5~50 mV s<sup>-1</sup> (a, c, e) and plots of  $\lg i_p \sim \lg v$  (b, d, f) of the KNF, KCF and KMF electrodes.

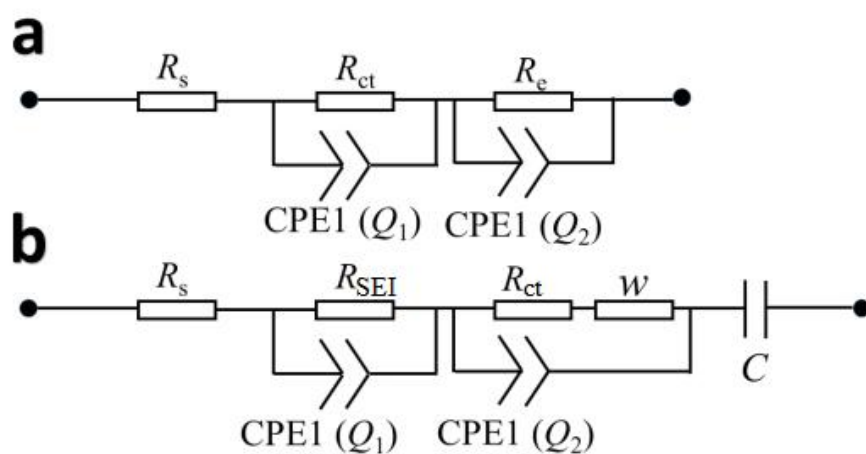

**Figure S15** (a) the equivalent circuits used to fit the experimental Nyquist plots before and (b) after cycling of KNCMF-3# electrode.

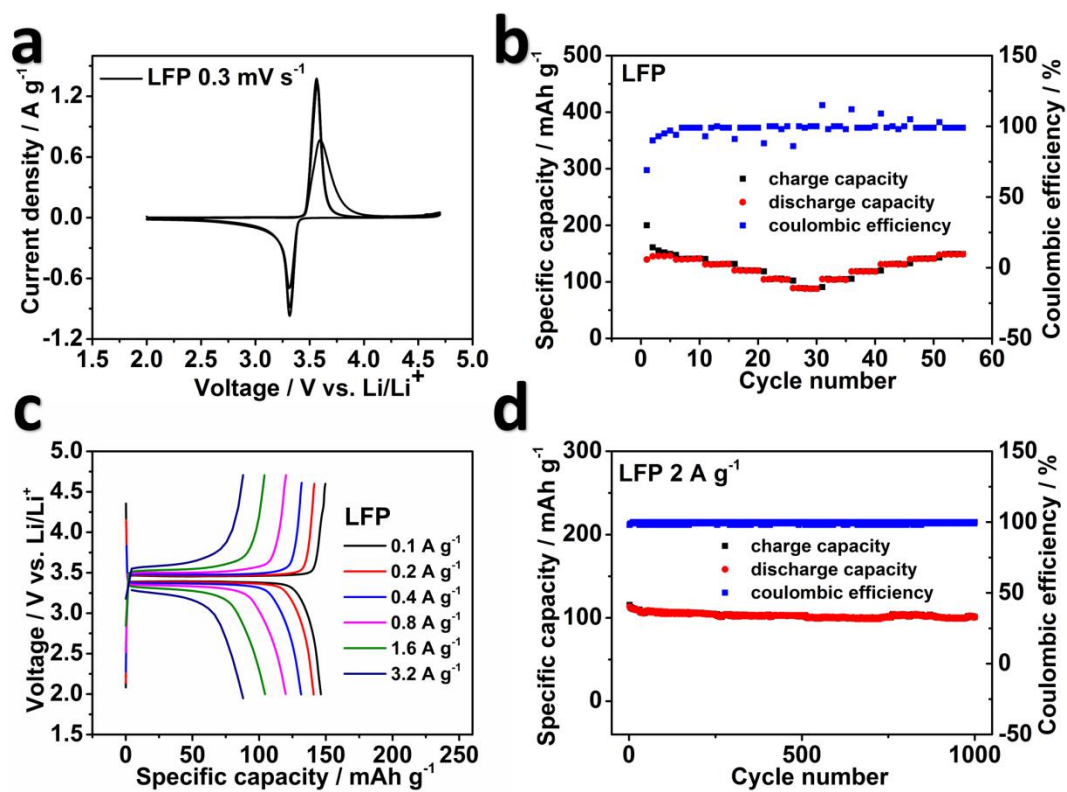

Figure S16 Performance of LFP electrode for Li-ion storage.

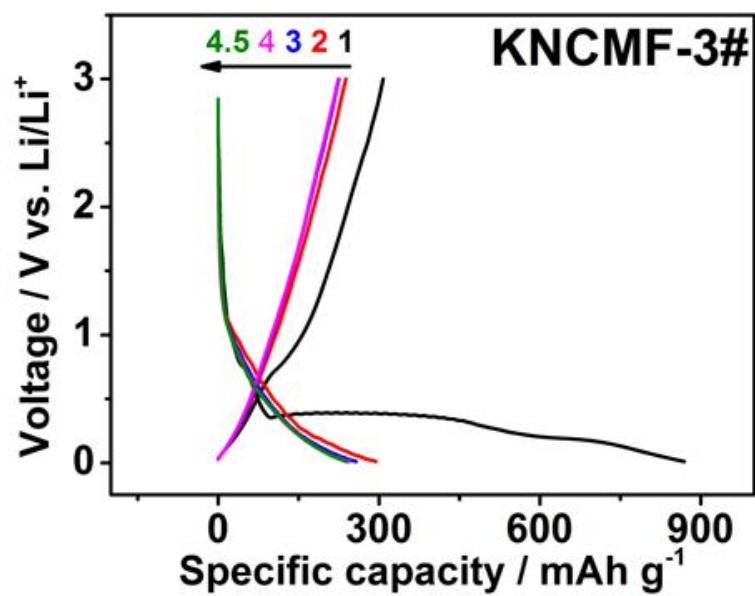

**Figure S17** GCD curves of KNCMF-3# electrode at the pre-charged current density of 0.1 A g<sup>-1</sup>.

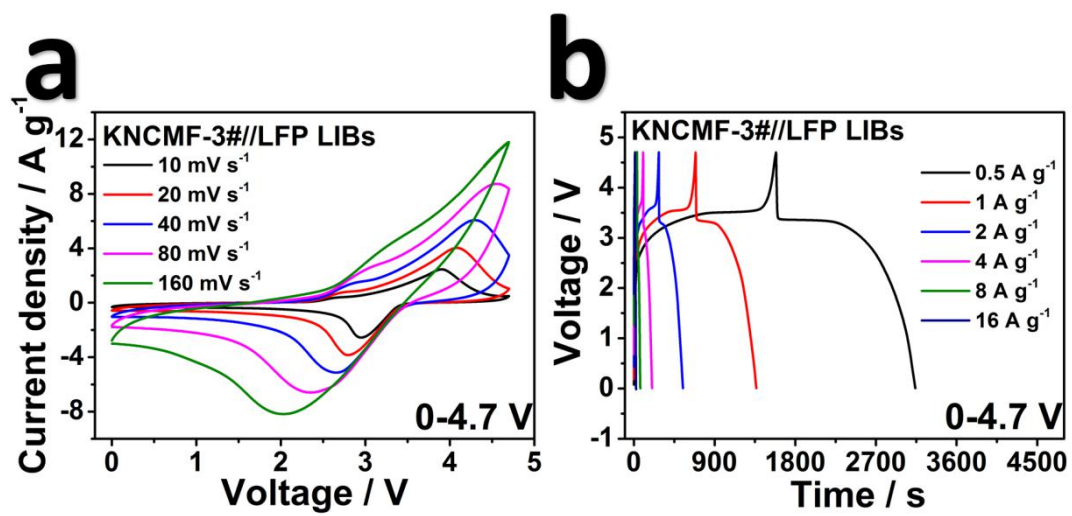

Figure S18 (a) CV plots of 4.7 V-KNCMF-3//LFP LIBs, (b) GCD curves of 4.7 V-KNCMF-3//LFP LIBs.



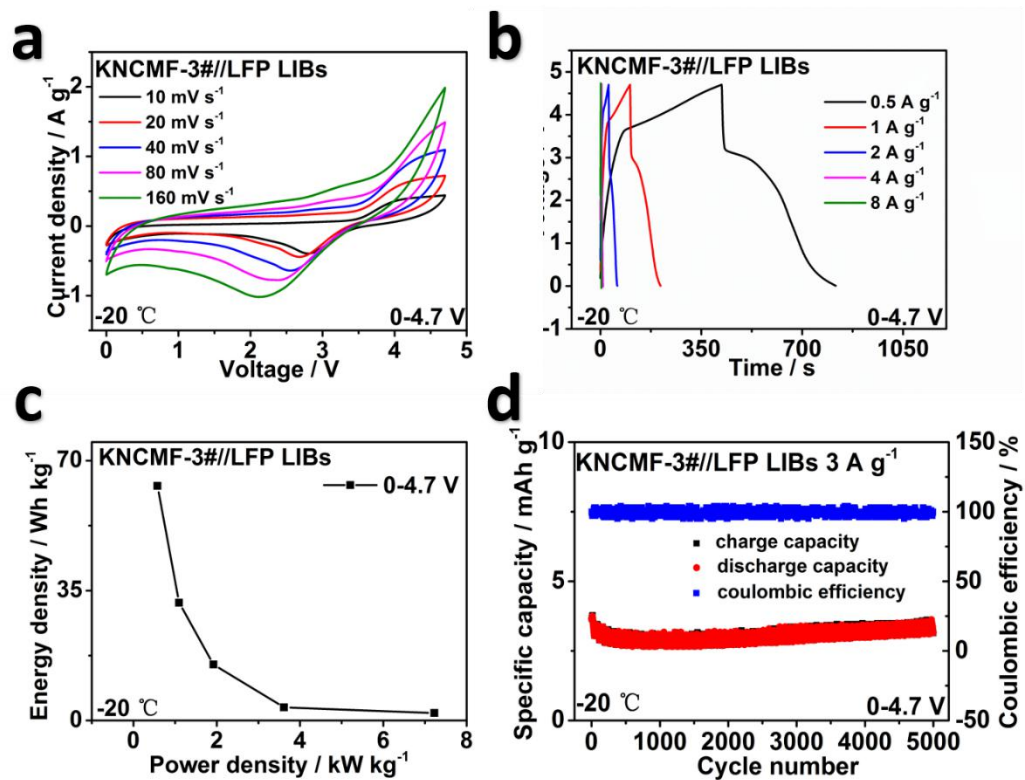

Figure S19 Performance of KNCMF-3#//LFP LIBs at the -20°C.

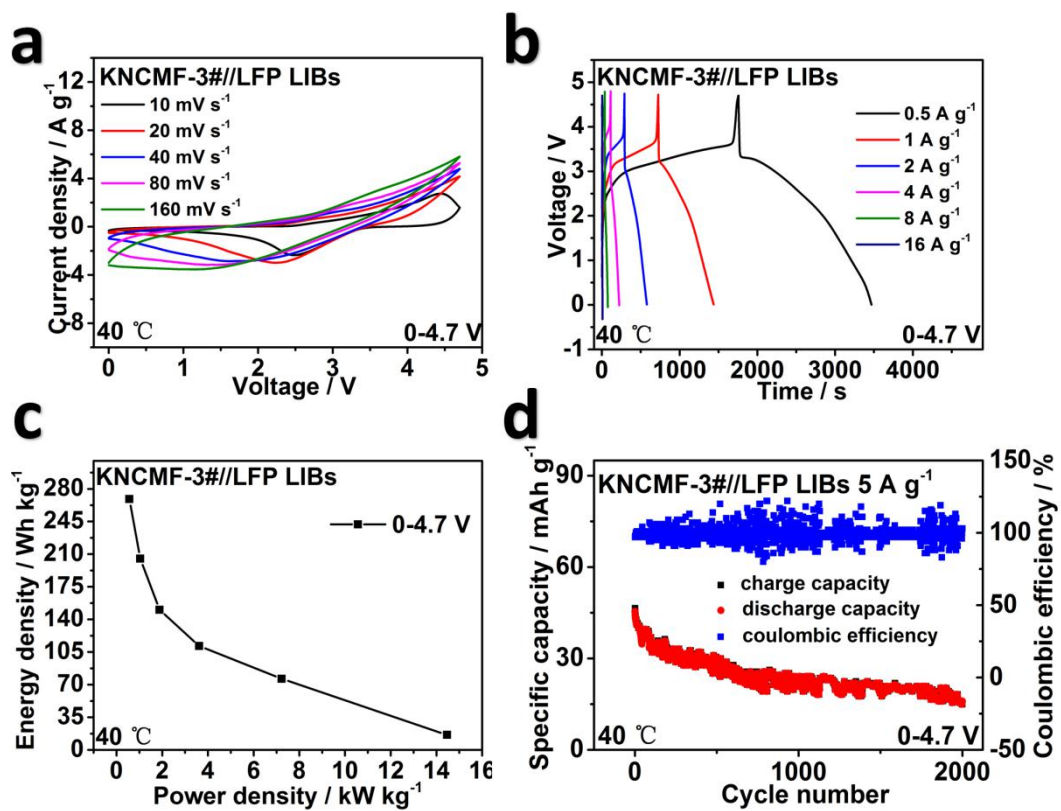

Figure S20 Performance of KNCMF-3//LFP LIBs at the 40 °C.

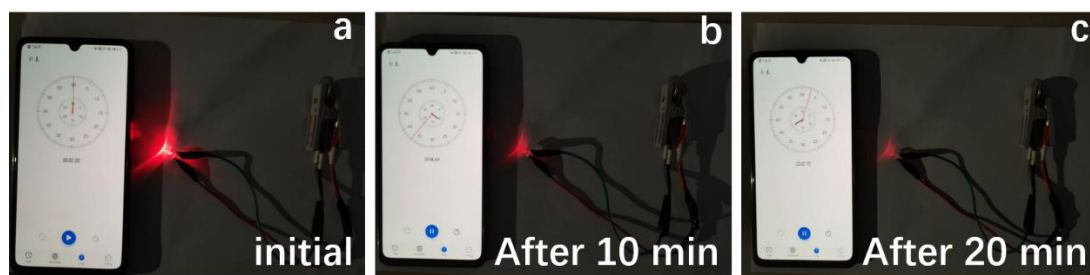

**Figure S21** The experiment on lighting up a LED lamp at different time points based on the KNCMF//LFP LIB, (a) initial, (b) after 10 minutes, and (c) after 20 minutes.

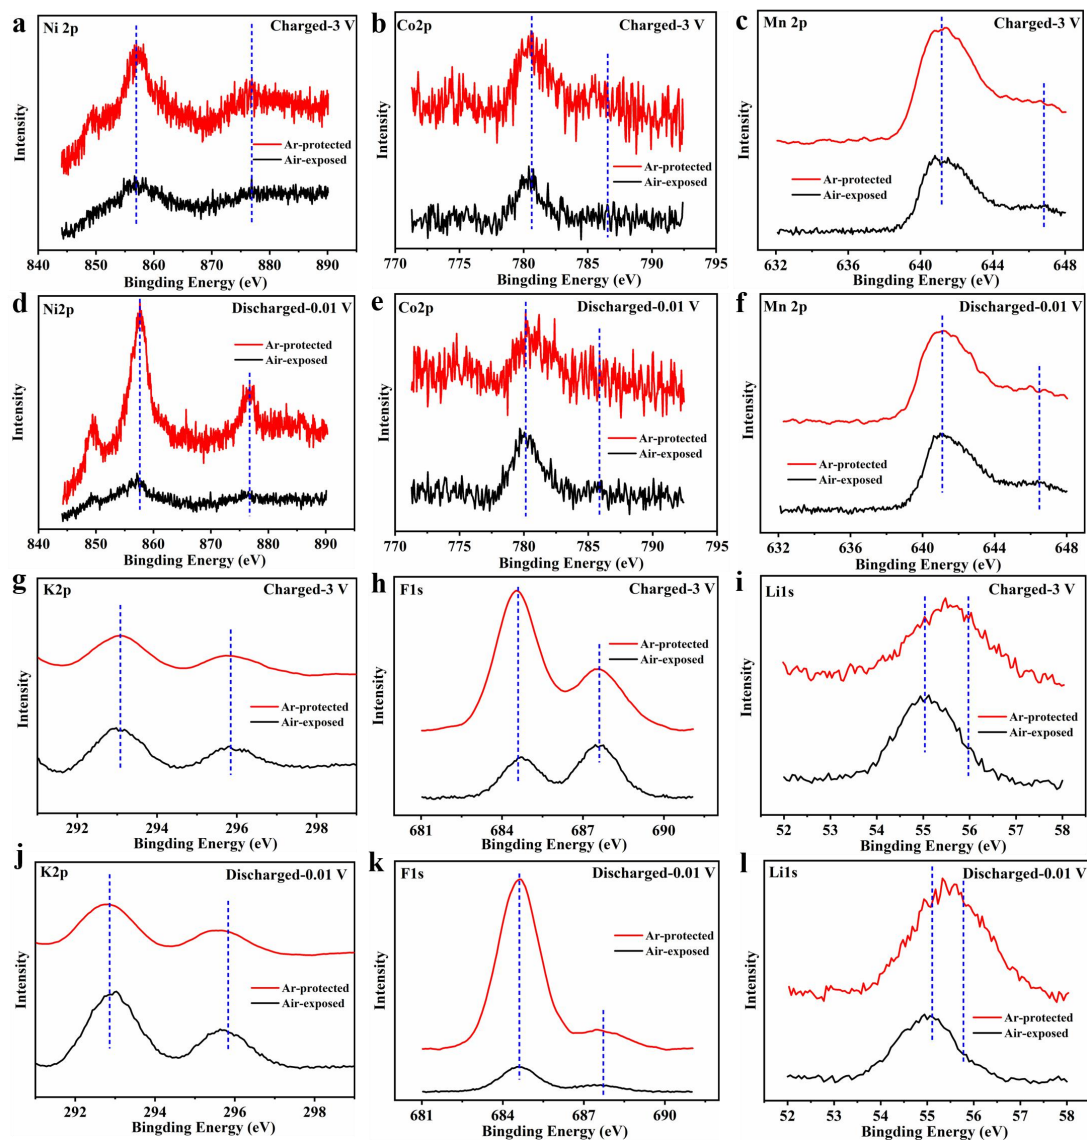

**Figure S22** XPS control experiments (Ar-protected and Air-exposed) of the KNCMF-3# electrode in charged-3 V and discharged-0.01 V states for the first cycle.

XPS control experiments (Ar-protected and Air-exposed) of the KNCMF-3# charged/discharged samples have also conducted to examine the influence of aging time on the XPS results (Fig. S22), which show that the plots shapes and peaks binding energy of Ni2p, Co2p, Mn2p, K2p and F1s are basically same, although the light difference in peak binding energy of Li1s owing to the light difference of charge/discharge capacity and virable SEI thickness of the specific electrodes, showing that the aging time in air has a negligible influence on the XPS interpretation.

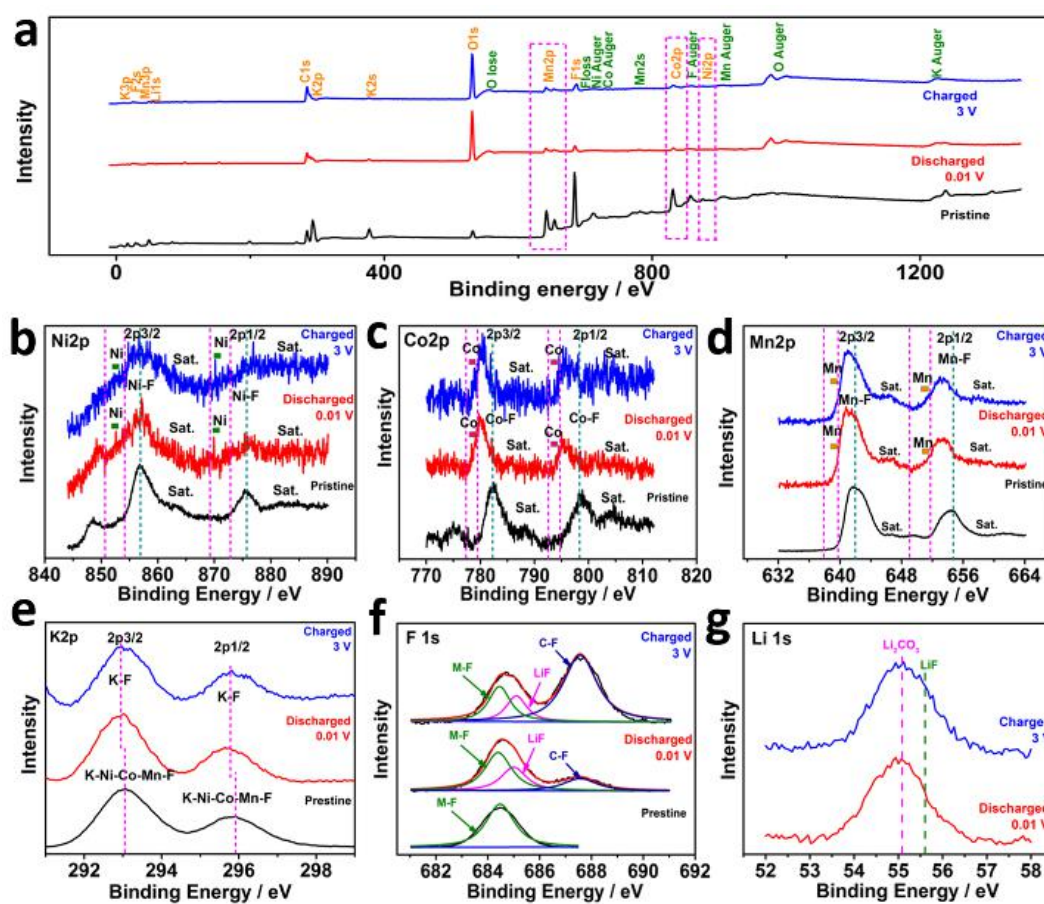

**Figure S23** XPS spectra (Air-exposed) of the KNCMF-3# electrode in pristine, discharged -0.01 V and charged -3 V states for the first cycle at  $0.05 \text{ A g}^{-1}$ : (a) survey, (b) Ni2p, (c) Co2p, (d) Mn2p, (e) K2p, (f) F1s and (g) Li1s.

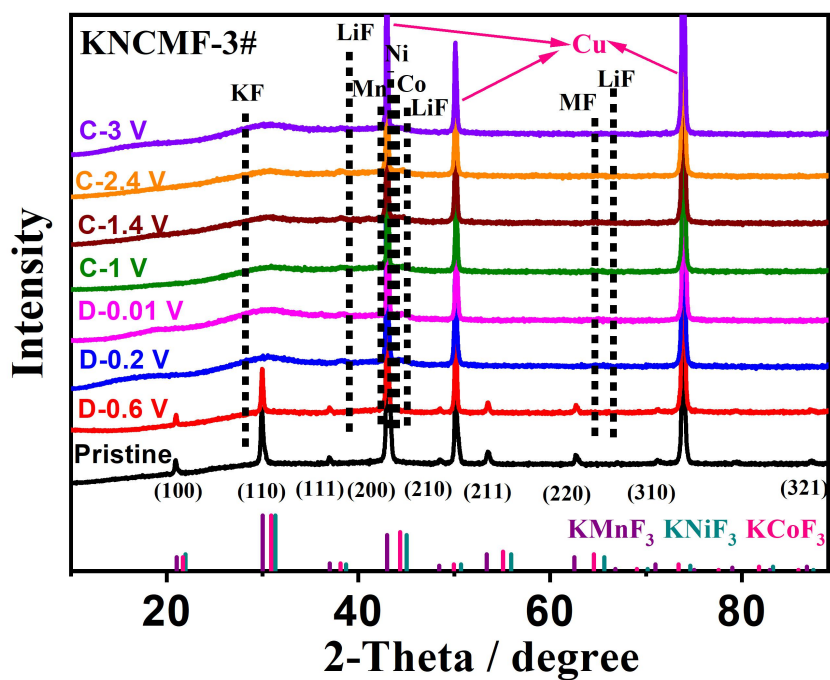

**Figure S24** Ex-situ XRD plots in pristine and initial discharged/charged states (discharged-0.6 V, discharged-0.2 V, discharged-0.01 V, charged-1 V, charged-1.4 V, charged-2.4 V, charged-3 V) of the KNCMF-3# electrode.

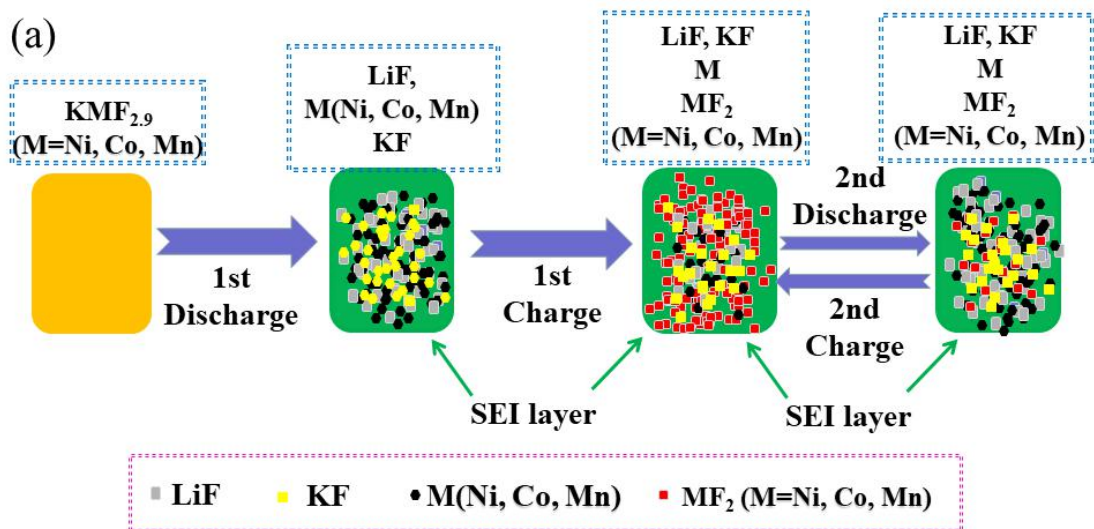

(b)

| Phases            | PDF Card | Crystal system | Space group | Cell (a x b x c) / Å  |
|-------------------|----------|----------------|-------------|-----------------------|
| Ni                | 45-1027  | Hexagonal      | P63/mmc     | 2.651 × 2.651 × 4.343 |
| Co                | 05-0727  | Hexagonal      | P63/mmc     | 2.503 × 2.503 × 4.061 |
| Mn                | 17-0910  | Tetragonal     | I4/mmm      | 2.672 × 2.672 × 3.55  |
| LiF               | 45-1460  | Cubic          | Fm-3m       | 4.027 × 4.027 × 4.027 |
| NiF <sub>2</sub>  | 24-0792  | Tetragonal     | P42/mmm     | 4.651 × 4.651 × 3.084 |
| CoF <sub>2</sub>  | 38-0883  | Cubic          | Pa3         | 4.958 × 4.958 × 4.958 |
| MnF <sub>2</sub>  | 34-1326  | Tetragonal     | P-42m       | 5.112 × 5.112 × 5.256 |
| KF                | 36-1458  | Cubic          | Fm-3m       | 5.348 × 5.348 × 5.348 |
| KNiF <sub>3</sub> | 21-1002  | Cubic          | Pm-3m       | 4.013 × 4.013 × 4.013 |
| KCoF <sub>3</sub> | 18-1006  | Cubic          | Pm-3m       | 4.071 × 4.071 × 4.071 |
| KMnF <sub>3</sub> | 17-0116  | Cubic          | Pm-3m       | 4.189 × 4.189 × 4.189 |

(c)

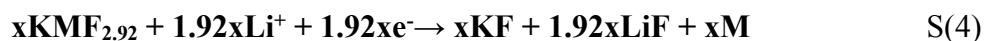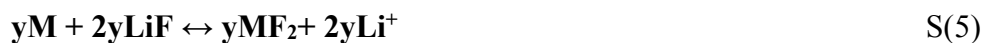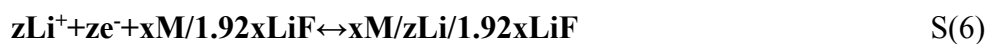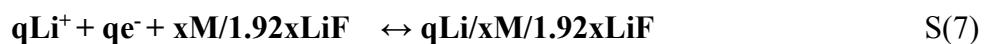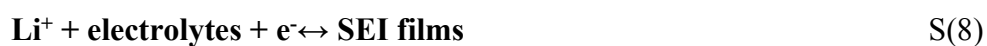

Where M=Ni, Co and Mn;  $0 < x < 1$ ;  $0 < y, z, q < x$ .

**Figure S25** (a) Schematics of reaction mechanisms of the KNCMF-3# electrode during the discharging/charging processes for the first two cycles for Li-ion storage; (b) Crystalline information of Ni, Co, Mn, LiF and  $\text{KMF}_3$  (M=Ni, Co, Mn) phases; (c) The equations for reaction mechanisms of the KNCMF-3# electrode for Li-ion storage.



| Level | Factors         |                   |                       |               |
|-------|-----------------|-------------------|-----------------------|---------------|
|       | mol ratio<br>-A | Solvent<br>(mL)-B | Temperature<br>(°C)-C | Time<br>(h)-D |
| 1     | 1:2             | EG+EA             | 160                   | 6             |
| 2     | 1:2.5           | EG+NPA            | 170                   | 12            |
| 3     | 1:3             | EG+NBA            | 180                   | 24            |

**Table S1** Orthogonal experimental design.

| Samples         | Conditions                                                  |
|-----------------|-------------------------------------------------------------|
| 1 <sup>#</sup>  | A <sub>1</sub> B <sub>1</sub> C <sub>1</sub> D <sub>1</sub> |
| 2 <sup>#</sup>  | A <sub>1</sub> B <sub>2</sub> C <sub>2</sub> D <sub>2</sub> |
| 3 <sup>#</sup>  | A <sub>1</sub> B <sub>3</sub> C <sub>3</sub> D <sub>3</sub> |
| 4 <sup>#</sup>  | A <sub>2</sub> B <sub>1</sub> C <sub>2</sub> D <sub>3</sub> |
| 5 <sup>#</sup>  | A <sub>2</sub> B <sub>2</sub> C <sub>3</sub> D <sub>1</sub> |
| 6 <sup>#</sup>  | A <sub>2</sub> B <sub>3</sub> C <sub>1</sub> D <sub>2</sub> |
| 7 <sup>#</sup>  | A <sub>3</sub> B <sub>1</sub> C <sub>3</sub> D <sub>2</sub> |
| 8 <sup>#</sup>  | A <sub>3</sub> B <sub>2</sub> C <sub>1</sub> D <sub>3</sub> |
| 9 <sup>#</sup>  | A <sub>3</sub> B <sub>3</sub> C <sub>2</sub> D <sub>1</sub> |
| 10 <sup>#</sup> | A <sub>1</sub> B <sub>3</sub> C <sub>3</sub> D <sub>1</sub> |

**Table S2** Synthesis conditions of KNCMF 1<sup>#</sup>~10<sup>#</sup>.

| samples          | Specific capacity / mAh g <sup>-1</sup> |                         |                         |                         |                         |                         | Cycle retention / % | Specific capacity after 1000 cycles / mAh g <sup>-1</sup> |
|------------------|-----------------------------------------|-------------------------|-------------------------|-------------------------|-------------------------|-------------------------|---------------------|-----------------------------------------------------------|
|                  | 0.1 (Ag <sup>-1</sup> )                 | 0.2 (Ag <sup>-1</sup> ) | 0.4 (Ag <sup>-1</sup> ) | 0.8 (Ag <sup>-1</sup> ) | 1.6 (Ag <sup>-1</sup> ) | 3.2 (Ag <sup>-1</sup> ) |                     |                                                           |
| KNCMF-1#         | 215                                     | 195                     | 178                     | 154                     | 122                     | 91                      | 76                  | 122                                                       |
| KNCMF-2#         | 197                                     | 173                     | 147                     | 123                     | 91                      | 63                      | 71                  | 82                                                        |
| <b>KNCMF-3#</b>  | <b>240</b>                              | <b>228</b>              | <b>213</b>              | <b>187</b>              | <b>147</b>              | <b>110</b>              | <b>72</b>           | <b>128</b>                                                |
| KNCMF-4#         | 292                                     | 278                     | 250                     | 214                     | 168                     | 119                     | 30                  | 61                                                        |
| KNCMF-5#         | 215                                     | 195                     | 178                     | 154                     | 122                     | 91                      | 69                  | 101                                                       |
| KNCMF-6#         | 241                                     | 216                     | 196                     | 165                     | 126                     | 79                      | 38                  | 57                                                        |
| KNCMF-7#         | 253                                     | 144                     | 87                      | 46                      | 19                      | 7                       | 118                 | 13                                                        |
| KNCMF-8#         | 278                                     | 127                     | 73                      | 42                      | 19                      | 8                       | 100                 | 12                                                        |
| KNCMF-9#         | 370                                     | 280                     | 189                     | 91                      | 40                      | 17                      | 115                 | 23                                                        |
| <b>KNCMF-10#</b> | <b>209</b>                              | <b>176</b>              | <b>139</b>              | <b>102</b>              | <b>68</b>               | <b>42</b>               | <b>91</b>           | <b>98</b>                                                 |

**Table S3** Summary of performance of KNCMF electrodes

| Test number                  | Experiment factor |                             |              |              | Capacity<br>(1A/g) | Rate<br>(%) | Cycle retention<br>(%)  |
|------------------------------|-------------------|-----------------------------|--------------|--------------|--------------------|-------------|-------------------------|
|                              | A<br>(mol ratio)  | B<br>(solvent)              | C<br>(°C)    | D<br>(h)     |                    |             |                         |
| 1#                           | 1(1:2)            | 1(EG+EA)                    | 1(160°C)     | 1(6h)        | 215                | 42          | 76                      |
| 2#                           | 1                 | 2(EG+NPA)                   | 2(170°C)     | 2(12h)       | 197                | 32          | 71                      |
| 3#                           | 1                 | 3(EG+NBA)                   | 3(180°C)     | 3(24h)       | 240                | 46          | 72                      |
| 4#                           | 2(1:2.5)          | 1                           | 2            | 3            | 292                | 41          | 30                      |
| 5#                           | 2                 | 2                           | 3            | 1            | 215                | 42          | 69                      |
| 6#                           | 2                 | 3                           | 1            | 2            | 241                | 33          | 38                      |
| 7#                           | 3(1:3)            | 1                           | 3            | 2            | 253                | 3           | 118                     |
| 8#                           | 3                 | 2                           | 1            | 3            | 278                | 3           | 100                     |
| 9#                           | 3                 | 3                           | 2            | 1            | 370                | 5           | 115                     |
| Specific Capacity<br>(mAh/g) | K1                | 652                         | 760          | 734          | 800                |             |                         |
|                              | K2                | 748                         | 690          | 859          | 691                |             |                         |
|                              | K3                | 901                         | 851          | 708          | 810                |             |                         |
|                              | k1                | 217.33                      | 253.33       | 244.67       | 266.67             |             |                         |
|                              | k2                | 249.33                      | 230.00       | 286.33       | 230.33             |             |                         |
|                              | k3                | 300.33                      | 283.67       | 236.00       | 270.00             |             |                         |
|                              | <b>R</b>          | <b>83.00</b>                | <b>53.67</b> | <b>41.67</b> | <b>36.33</b>       |             |                         |
| Rate<br>(%)                  | K1                | 120                         | 86           | 78           | 89                 |             |                         |
|                              | K2                | 116                         | 77           | 78           | 68                 |             |                         |
|                              | K3                | 11                          | 84           | 91           | 90                 |             |                         |
|                              | k1                | 40.00                       | 28.67        | 26.00        | 29.67              |             |                         |
|                              | k2                | 38.67                       | 25.67        | 26.00        | 22.67              |             |                         |
|                              | k3                | 3.67                        | 28.00        | 30.33        | 30.00              |             |                         |
|                              | <b>R</b>          | <b>36.33</b>                | <b>3.00</b>  | <b>4.33</b>  | <b>7.33</b>        |             |                         |
| Cycle retention<br>(%)       | K1                | 219                         | 224          | 214          | 260                |             |                         |
|                              | K2                | 137                         | 240          | 216          | 227                |             |                         |
|                              | K3                | 333                         | 225          | 259          | 202                |             |                         |
|                              | k1                | 73.00                       | 74.67        | 71.33        | 86.67              |             |                         |
|                              | k2                | 45.67                       | 80.00        | 72.00        | 75.67              |             |                         |
|                              | k3                | 111.00                      | 75.00        | 86.33        | 67.33              |             |                         |
|                              | <b>R</b>          | <b>65.33</b>                | <b>5.00</b>  | <b>15.00</b> | <b>19.33</b>       |             |                         |
|                              |                   | Specific capacity           |              |              | A>B>C>D            |             | A3B3C2D3(or D1)         |
|                              |                   | Rate retention              |              |              | A>D>C>B            |             | A1B1C3D3(or D1)         |
|                              |                   | Cycle retention             |              |              | A>D>C>B            |             | A3B2C3D1                |
|                              |                   | The optimal conditions      |              |              |                    |             | <b>A1B3C3(D1 or D3)</b> |
|                              |                   | Selected optimal conditions |              |              |                    |             | <b>A1B3C3D3</b>         |

KNCMF

**Table S4** Orthogonal experimental analysis results of KNCMF electrodes

| EIS parameters              |                        |                             |                        |
|-----------------------------|------------------------|-----------------------------|------------------------|
| Before cycling              |                        | After cycling               |                        |
| Model                       | R(QR)(QR)              | Model                       | R(QR)(Q(RW))C          |
| $R_s$ ( $\Omega$ )          | 3.348                  | $R_s$ ( $\Omega$ )          | 4.322                  |
| $Q_1$ (S·sec <sup>n</sup> ) | $1.518 \times 10^{-5}$ | $Q_1$ (S·sec <sup>n</sup> ) | $8.806 \times 10^{-6}$ |
| $n_1$                       | 0.8523                 | $n_1$                       | 0.9694                 |
| $R_{ct}$ ( $\Omega$ )       | 56.83                  | $R_{SEI}$ ( $\Omega$ )      | 3.793                  |
| $Q_2$ (S·sec <sup>n</sup> ) | $6.698 \times 10^{-4}$ | $Q_2$ (S·sec <sup>n</sup> ) | $1.25410^{-3}$         |
| $n_2$                       | 0.9538                 | $n_2$                       | 0.4712                 |
| $R_e$ ( $\Omega$ )          | $1.195 \times 10^5$    | $R_{ct}$ ( $\Omega$ )       | 41.23                  |
| $\chi^2$                    | $2.39 \times 10^{-3}$  | $W$ (S·sec <sup>0.5</sup> ) | 0.03593                |
|                             |                        | $C$ (F)                     | 0.05372                |
|                             |                        | $\chi^2$                    | $9.56 \times 10^{-4}$  |

**Table S5** EIS parameters of KNCMF-3# electrode before and after cycling.

| Systems               | $Q_m$ (mAh g <sup>-1</sup> , 0.1A/g) |                    | $m_+/m_-$ |
|-----------------------|--------------------------------------|--------------------|-----------|
|                       | Positive electrode                   | Negative electrode |           |
|                       | LFP                                  | KNCMF- 3#          |           |
| KNCMF-3#//LFP<br>LIBs | 146                                  | 240                | 1.6:1     |

**Table S6** Design of  $m_+/m_-$  ratios for KCMF-3#//LFP LIBs.

| Systems               | Voltage window | Energy density<br>(Wh kg <sup>-1</sup> ) | Power density<br>(kW kg <sup>-1</sup> ) | Cycles                                  |
|-----------------------|----------------|------------------------------------------|-----------------------------------------|-----------------------------------------|
| KNCMF-3#//LFP<br>LIBs | 0-4.7 V        | <b>270.5~35.9</b>                        | <b>0.63~11.6</b>                        | 5 A g <sup>-1</sup> /1000/ <b>84.8%</b> |
|                       |                |                                          |                                         | 5 A g <sup>-1</sup> /2000/ <b>82.6%</b> |
|                       |                |                                          |                                         | 5 A g <sup>-1</sup> /3000/ <b>86.2%</b> |
|                       |                |                                          |                                         | 5 A g <sup>-1</sup> /5000/ <b>71.1%</b> |

**Table S7** Summary of performance of KNCMF-3#//LFP LIBs at room temperature (about 25 °C).

| <b>LIBs Systems</b>                                                                                                       | <b>Voltage window / V</b> | <b>Energy density / Wh kg<sup>-1</sup></b> | <b>Power density / kW kg<sup>-1</sup></b> | <b>Cycling behavior / retention%, repeated cycles current density</b>    | <b>Refs.</b>     |
|---------------------------------------------------------------------------------------------------------------------------|---------------------------|--------------------------------------------|-------------------------------------------|--------------------------------------------------------------------------|------------------|
| Li <sub>4/3</sub> Ti <sub>5/3</sub> O <sub>4</sub> //LiNi <sub>x</sub> Co <sub>y</sub> Mn <sub>1-x-y</sub> O <sub>2</sub> | 1.5-2.7                   | 90                                         | 2.2                                       | #                                                                        | <b>S1</b>        |
| Li <sub>4</sub> Ti <sub>5</sub> O <sub>12</sub> -Li <sub>2</sub> Ti <sub>3</sub> O <sub>7</sub> //LiFePO <sub>4</sub>     | 1.9-2.5                   | 75                                         | 0.048                                     | #                                                                        | <b>S2</b>        |
| TiO <sub>2</sub> nanofiber//LiMn <sub>2</sub> O <sub>4</sub>                                                              | 1.7-2.5                   | 220                                        | 0.314                                     | 90%/700/0.3 A g <sup>-1</sup>                                            | <b>S3</b>        |
| FeSb-TiC//Li <sub>1+x</sub> Mn <sub>1.5</sub> Ni <sub>0.5</sub> O <sub>4</sub>                                            | 0-5.0                     | 260                                        | 0.127                                     | 68%/50/0.0365 A g <sup>-1</sup>                                          | <b>S4</b>        |
| Graphene/Si multilayer//<br>LiNi <sub>1/3</sub> Mn <sub>1/3</sub> Co <sub>1/3</sub> O <sub>2</sub>                        | 3-4.3                     | 156                                        | 0.03                                      | 70.4%/15/0.0375 A g <sup>-1</sup>                                        | <b>S5</b>        |
| TiO <sub>2</sub> hollow nanofiber<br>//LiFePO <sub>4</sub>                                                                | 0.9-2.5                   | 165                                        | 0.16                                      | 88%/300/0.1 A g <sup>-1</sup>                                            | <b>S6</b>        |
| Ni <sub>3</sub> N nanosheets//LiNi <sub>0.5</sub> Mn <sub>1.5</sub> O <sub>4</sub>                                        | 2.5-4.1                   | 120                                        | 3.39                                      | 99%/250/1.4 A g <sup>-1</sup>                                            | <b>S7</b>        |
| <b>KNCMF-3#//LFP</b>                                                                                                      | <b>0-4.7</b>              | <b>270.5-35.9</b>                          | <b>0.63-11.6</b>                          | <b>86%/3000/5 A g<sup>-1</sup></b><br><b>71%/5000/5 A g<sup>-1</sup></b> | <b>This work</b> |

**Table S8.** A performance comparison of this work with some reported LIBs.



| Systems            | T (°C) | Voltage window | Energy density (Wh kg <sup>-1</sup> ) | Power density (kW kg <sup>-1</sup> ) | Cycles                                  |
|--------------------|--------|----------------|---------------------------------------|--------------------------------------|-----------------------------------------|
| KNCMF-3#//LFP LIBs | -20    | 0-4.7 V        | <b>63.2~2</b>                         | <b>0.63~11.6</b>                     | 3 A g <sup>-1</sup> /1000/ <b>78.1%</b> |
|                    |        |                |                                       |                                      | 3 A g <sup>-1</sup> /2000/ <b>78.1%</b> |
|                    |        |                |                                       |                                      | 3 A g <sup>-1</sup> /3000/ <b>84.4%</b> |
|                    |        |                |                                       |                                      | 3 A g <sup>-1</sup> /5000/ <b>86.8%</b> |
|                    | 40     | 0-4.7 V        | <b>268.5~16</b>                       | <b>0.57~14.5</b>                     | 5 A g <sup>-1</sup> /500/ <b>64.8%</b>  |
|                    |        |                |                                       |                                      | 5 A g <sup>-1</sup> /1000/ <b>50.4%</b> |
|                    |        |                |                                       |                                      | 5 A g <sup>-1</sup> /1500/ <b>42.3%</b> |
|                    |        |                |                                       |                                      | 5 A g <sup>-1</sup> /2000/ <b>35.2%</b> |

**Table S9** Summary of performance of KNCMF-3#//LFP LIBs at the -20 / 40 °C.

| LIBs                 | Working voltage/<br>V | Energy density/<br>Wh kg <sup>-1</sup> | Power density/<br>kW kg <sup>-1</sup> | Cycling behavior/<br>retention%,<br>repeated cycles,<br>current density | Refs             |
|----------------------|-----------------------|----------------------------------------|---------------------------------------|-------------------------------------------------------------------------|------------------|
| KNCF(1:6)//LFP       | 0-4.7                 | 173-29                                 | 0.75-15.3                             | 67% / 2000 / 2 A g <sup>-1</sup>                                        | S8               |
| NNCF(1:1)//LFP       | 1~4.7                 | 196.2~35.2                             | 0.8~19.2                              | 63% / 2000 / 3 A g <sup>-1</sup>                                        | S9               |
| KZMF(1-3)//LFP       | 0.5-4.6               | 130.8~15.9                             | 0.8~14.3                              | 48% / 5000 / 5 A g <sup>-1</sup>                                        | S10              |
| <b>KNCMF-3#//LFP</b> | <b>0~4.7</b>          | <b>270.5~35.9</b>                      | <b>0.63~11.6</b>                      | <b>71% / 5000 / 5 A g<sup>-1</sup></b>                                  | <b>This work</b> |

Note: KNCF(1:6), NNCF(1:1), KZMF(1-3) and KNCMF-3# mean the materials of  $K_{1.0}Ni_{0.1}Co_{0.9}F_{3.0}$ ,  $Na_{0.85}Ni_{0.45}Co_{0.55}F_{3.56}$ ,  $K_{1.1}Zn_{0.17}Mn_{0.83}F_{3.03}$  and  $K_{1.00}Ni_{0.06}Co_{0.14}Mn_{0.80}F_{2.92}$  respectively.

**Table S10.** A performance comparison of this work with some reported perovskite fluorides anode materials for LIBs.

| <b>Materials, chemicals and reagents</b> | <b>Type or level</b>    | <b>Company</b>         | <b>Characteristics</b>                                                                            |
|------------------------------------------|-------------------------|------------------------|---------------------------------------------------------------------------------------------------|
| <b>NiCl<sub>2</sub>•6H<sub>2</sub>O</b>  | AR                      | SinoPharm              | Purity≥98.0%                                                                                      |
| <b>CoCl<sub>2</sub>•6H<sub>2</sub>O</b>  | AR                      | SinoPharm              | Purity≥99.0%                                                                                      |
| <b>MnCl<sub>2</sub>•4H<sub>2</sub>O</b>  | AR                      | SinoPharm              | Purity≥99.0%                                                                                      |
| <b>KF•2H<sub>2</sub>O</b>                | AR                      | SinoPharm              | Purity≥99.0%                                                                                      |
| <b>PVP-K30</b>                           | GR                      | SinoPharm              | #                                                                                                 |
| <b>EG</b>                                | AR                      | SinoPharm              | Purity≥99.0%                                                                                      |
| <b>EA</b>                                | AR                      | SinoPharm              | Purity≥99.7%                                                                                      |
| <b>NPA</b>                               | AR                      | SinoPharm              | Purity≥99.0%                                                                                      |
| <b>NBA</b>                               | AR                      | SinoPharm              | Purity≥99.5%                                                                                      |
| <b>LiFePO<sub>4</sub></b>                | LFP-NCO                 | Aleees                 | D50: 4 ± 2 μm;<br>Tab: 1 ± 0.2 g cm <sup>-3</sup> ;<br>SSA: 13 ± 2 m <sup>2</sup> g <sup>-1</sup> |
| <b>AB</b>                                | Battery grade           | #                      | #                                                                                                 |
| <b>NMP</b>                               | AR                      | Kermel                 | Purity≥99.0%                                                                                      |
| <b>PVDF</b>                              | Battery grade           | #                      | #                                                                                                 |
| <b>Electrolytes</b>                      | LBC-305-01              | CAPCHEM                | 1 M LiPF <sub>6</sub> /EC: EMC: DMC<br>(1:1:1)/1% VC                                              |
| <b>Li plate</b>                          | 15.6*0.45 mm            | China Energy           | 15.6*0.45 mm                                                                                      |
| <b>Cu foil</b>                           | 200*0.015               | GuangZhou<br>JiaYuan   | Total thickness: 15 μm;<br>Weight: 87 g m <sup>-2</sup>                                           |
| <b>Carbon coated-Al foil</b>             | 222*0.015               | GuagZhou<br>NaNuo      | Total thickness: 17 μm;<br>Strength: 192 Ma                                                       |
| <b>Glass microfiber filters</b>          | GF/D 2.7 μm<br>1823-025 | Whatman                | Diameter: 25 mm;<br>Thickness: 675 μm;<br>Weight: 121 g m <sup>-2</sup>                           |
| <b>Cell components</b>                   | CR-2032                 | ShenZhen<br>TianChenHe | #                                                                                                 |

**Table S11.** Chemicals, reagents and materials used in the study.

## References

- S1. N. Takami, H. Inagaki, Y. Tatebayashi, H. Saruwatari, K. Honda and S. Egusa, *J. Power Sources*, 2013, **244**, 469-475.
- S2. G. N. Zhu, L. Chen, Y. G. Wang, C. X. Wang, R. C. Che and Y. Y. Xia, *Adv. Funct. Mater.*, 2013, **23**, 640-647.
- S3. V. Aravindan, J. Sundaramurthy, P. S. Kumar, N. Shubha, W. C. Ling, S. Ramakrishna and S. Madhavi, *Nanoscale*, 2013, **5**, 10636-10645.
- S4. Z. Moorhead-Rosenberg, E. Allcorn and A. Manthiram, *Chem. Mater.*, 2014, **26**, 5905-5913.
- S5. L. W. Ji, H. H. Zheng, A. Ismach, Z. K. Tan, S. D. Xun, E. Lin, V. Battaglia, V. Srinivasan and Y. G. Zhang, *Nano Energy*, 2012, **1**, 164-171.
- S6. X. Zhang, V. Aravindan, P. S. Kumar, H. Liu, J. Sundaramurthy, S. Ramakrishna and S. Madhavi, *Nanoscale*, 2013, **5**, 5973-5980.
- S7. M. S. Balogun, Y. X. Zeng, W. T. Qiu, Y. Luo, A. Onasanya, T. K. Olaniyi and Y. X. Tong, *J. Mater. Chem. A*, 2016, **4**, 9844-9849.
- S8. Q. L. Xu, R. Ding, W. Shi, D. F. Ying, Y. F. Huang, T. Yan, P. Gao, X. J. Sun and E. H. Liu, *J. Mater. Chem. A*, 2019, **7**, 8315-8326.
- S9. W. Shi, R. Ding, Q. L. Xu, T. Yan, Y. X. Huang, C. N. Tan, X. J. Sun, P. Gao and E. H. Liu, *Chem. Commun.*, 2019, **55**, 6739-6742.
- S10. D. F. Ying, Q. L. Xu, R. Ding, Y. F. Huang, T. Yan, Y. X. Huang, C. N. Tan, X. J. Sun, P. Gao and E. H. Liu, *Chem. Eng. J.*, 2020, **388**, 124154.
